# Supplementary material for: Similarities and Differences of Hsp70, hsc70, Grp78 and Mortalin as Cancer Biomarkers and Drug Targets
Source: MDPI journal article supplement (doi:10.3390/cells10112996), 2021-11-03
Supplement: s1 [file s1]

**Supplemental Table S3. Top 5 Diseases and Biological Functions Associated with Hsp70-1, hsc70, Grp78 and mortalin.**

| <b>Name</b>                         | <b>p-value range</b> | <b># Molecules</b> |
|-------------------------------------|----------------------|--------------------|
| <b>Hsp70-1</b>                      |                      |                    |
| Cancer                              | 1.37E-21 - 5.25E-54  | 560                |
| Infectious Diseases                 | 2.42E-24 - 8.83E-52  | 210                |
| Organismal Injury and Abnormalities | 1.60E-21 - 8.70E-49  | 563                |
| Reproductive System Disease         | 2.38E-22 - 4.83E-44  | 431                |
| Endocrine System Disorders          | 2.24E-37 - 3.92E-41  | 486                |
| <b>Hsc70</b>                        |                      |                    |
| Cancer                              | 4.73E-22 - 1.13E-93  | 1303               |
| Organismal Injury and Abnormalities | 4.75E-22 - 1.13E-93  | 1315               |
| Endocrine System Disorders          | 3.30E-22 - 3.48E-79  | 1144               |
| Gastrointestinal Disease            | 3.30E-22 - 5.77E-74  | 1201               |
| Infectious Diseases                 | 2.83E-25 - 2.98E-66  | 396                |
| <b>Grp78</b>                        |                      |                    |
| Cancer                              | 2.21E-19 - 3.11E-70  | 934                |
| Organismal Injury and Abnormalities | 2.21E-19 - 3.11E-70  | 939                |
| Gastrointestinal Disease            | 2.41E-19 - 1.47E-56  | 872                |
| Endocrine System Disorders          | 5.54E-20 - 6.06E-54  | 818                |
| Reproductive System Disease         | 2.21E-19 - 3.17E-44  | 711                |
| <b>Mortalin</b>                     |                      |                    |
| Cancer                              | 4.82E-16 - 1.27E-37  | 473                |
| Organismal Injury and Abnormalities | 4.82E-16 - 2.20E-37  | 476                |
| Reproductive System Disease         | 1.96E-16 - 9.22E-37  | 372                |
| Endocrine System Disorders          | 4.47E-31 - 1.97E-33  | 416                |
| Renal and Urological Disease        | 1.74E-16 - 2.05E-33  | 195                |
