# Supplementary material for: Similarities and Differences of Hsp70, hsc70, Grp78 and Mortalin as Cancer Biomarkers and Drug Targets
Source: MDPI journal article supplement (doi:10.3390/cells10112996), 2021-11-03
Supplement: s1 [file s1]

**Supplementary Table S5. Top 5 Molecular and Cellular Functions Associated with Hsp70-1, hsc70, Grp78 and mortalin.**

| <b>Name</b>                       | <b>p-value range</b>  | <b># Molecules</b> |
|-----------------------------------|-----------------------|--------------------|
| <b>Hsp70-1</b>                    |                       |                    |
| Cell Death and Survival           | 1.98E-21 - 4.81E-91   | 368                |
| Cell Cycle                        | 1.91E-21 - 3.34E-73   | 281                |
| Gene Expression                   | 3.01E-32 - 1.25E-71   | 278                |
| Cellular Development              | 2.25E-21 - 2.65E-65   | 342                |
| Cellular Growth and Proliferation | 2.25E-21 - 2.65E-65   | 328                |
| <b>Hsc70</b>                      |                       |                    |
| Cell Death and Survival           | 7.37E-23 - 8.29E-117  | 737                |
| Cell Cycle                        | 1.22E-23 - 1.08E-85 4 | 56                 |
| Gene Expression                   | 5.09E-24 - 6.20E-85   | 523                |
| Cellular Development              | 2.99E-22 - 1.79E-75   | 597                |
| Cellular Growth and Proliferation | 2.99E-22 - 1.79E-75   | 611                |
| <b>Grp78</b>                      |                       |                    |
| Cell Death and Survival           | 1.98E-19 - 9.32E-94   | 529                |
| Cell Cycle                        | 1.21E-19 - 1.99E-63   | 328                |
| Protein Synthesis                 | 1.51E-19 - 1.46E-60   | 237                |
| Cellular Development              | 2.20E-19 - 1.02E-57   | 464                |
| Cellular Growth and Proliferation | 1.76E-19 - 1.02E-57   | 452                |
| <b>Mortalin</b>                   |                       |                    |
| Cell Death and Survival           | 3.77E-16 - 3.43E-78   | 320                |
| Cell Cycle                        | 5.20E-16 - 1.64E-51   | 222                |
| Cellular Development              | 2.86E-16 - 4.13E-51   | 275                |
| Cellular Growth and Proliferation | 1.73E-16 - 4.13E-51   | 274                |
| Gene Expression                   | 9.98E-29 - 8.91E-47   | 216                |
