# Supplementary material for: Similarities and Differences of Hsp70, hsc70, Grp78 and Mortalin as Cancer Biomarkers and Drug Targets
Source: MDPI journal article supplement (doi:10.3390/cells10112996), 2021-11-03
Supplement: s1 [file s1]

**Supplementary Table S4. Top 5 Physiological System Development and Functions Associated with Hsp70-1, hsc70, Grp78 and mortalin.**

| <b>Name</b>                                   | <b>p-value range</b> | <b># Molecules</b> |
|-----------------------------------------------|----------------------|--------------------|
| <b>Hsp70-1</b>                                |                      |                    |
| Organismal Survival                           | 1.87E-32 - 2.25E-67  | 283                |
| Embryonic Development                         | 1.76E-21 - 2.57E-45  | 278                |
| Organismal Development                        | 1.76E-21 - 2.57E-45  | 332                |
| Connective Tissue Development and Function    | 4.07E-22 - 1.71E-42  | 173                |
| Tissue Morphology                             | 1.60E-21 - 2.59E-42  | 267                |
| <b>Hsc70</b>                                  |                      |                    |
| Organismal Survival                           | 1.45E-32 - 2.86E-77  | 530                |
| Embryonic Development                         | 3.28E-23 - 6.05E-49  | 487                |
| Tissue Morphology                             | 4.21E-22 - 2.89E-42  | 432                |
| Organismal Development                        | 1.39E-22 - 1.24E-39  | 647                |
| Connective Tissue Development and Function    | 1.99E-23 - 3.22E-39  | 215                |
| <b>Grp78</b>                                  |                      |                    |
| Organismal Survival                           | 1.39E-29 - 1.30E-62  | 395                |
| Tissue Morphology                             | 1.73E-19 - 9.71E-51  | 396                |
| Embryonic Development                         | 1.55E-19 - 1.12E-44  | 372                |
| Connective Tissue Development and Function    | 1.87E-19 - 1.09E-42  | 268                |
| Tissue Development                            | 2.20E-19 - 1.09E-42  | 415                |
| <b>Mortalin</b>                               |                      |                    |
| Embryonic Development                         | 2.86E-16 - 2.20E-49  | 209                |
| Organismal Survival                           | 9.73E-28 - 6.70E-46  | 224                |
| Tissue Morphology                             | 2.32E-16 - 4.71E-38  | 217                |
| Lymphoid Tissue Structure and Development     | 6.28E-17 - 4.97E-34  | 155                |
| Hematological System Development and Function | 4.60E-16 - 9.32E-33  | 183                |
