# Supplementary material for: Similarities and Differences of Hsp70, hsc70, Grp78 and Mortalin as Cancer Biomarkers and Drug Targets
Source: Cells. 2021 Nov 3;10(11):2996. doi: 10.3390/cells10112996 (PMC8616428; doi:10.3390/cells10112996)
Supplement: Supplementary file 1 [file cells-10-02996-s001.zip]

Archive with 5 entries (5 files):
- Supplementary Table S1.pdf
- Supplementary Table S2.xls
- Supplementary Table S3.pdf
- Supplementary Table S4.pdf
- Supplementary Table S5.pdf
