# Supplementary material for: Similarities and Differences of Hsp70, hsc70, Grp78 and Mortalin as Cancer Biomarkers and Drug Targets
Source: Cells. 2021 Nov 3;10(11):2996. doi: 10.3390/cells10112996 (PMC8616428; doi:10.3390/cells10112996)
Supplement: Supplementary file 1 [file cells-10-02996-s001.zip › Supplementary Table S2.xls]

## Sheet: Sheet0
HSPA1A	HSPA5	HSPA8	HSPA9	Common to 1A, 5, 8, and 9	Common to 1A and 5	Common to 1A and 8	Common to 1A and 9	Common to 5 and 8	Common to 5 and 9	Common to 8 and 9	Unique to 1A	Unique to 5	Unique to 8	Unique to 9
AAR2	A2M	AAR2	AAR2	AAR2	AAR2	AAR2	AAR2	AAR2	AAR2	AAR2	ACTC1	A2M	ABCE1	ACACA
ABL1	AADAT	ABCA2	ABCA2	AIMP2	ADRB2	ABL1	ADRB2	ACO2	ACO2	ABCA2	AKTIP	AADAT	ABHD15	AGO3
ACTC1	AAK1	ABCE1	ACACA	AKT1	AGO4	ADSS2	AIFM1	ACTB	ACTB	ACO2	ANO7	AAK1	ABI1	ANAPC1
ADRB2	AAR2	ABHD15	ACO2	ANKRD55	AGR2	AGO4	AIMP2	ACTG1	ADRB2	ACTB	ANXA1	ABCC6	ABL2	ANAPC4
ADSS2	ABCC6	ABI1	ACTB	ARAF	AHSA1	AGR2	AKT1	ADSL	AHI1	AGO1	APAF1	ABCF3	ACADS	ANAPC5
AGO4	ABCF3	ABL1	ADRB2	ARIH2	AIMP2	AHSA1	ANKRD55	AGO4	AIMP2	AGO2	APEX1	ACP5	ACAT1	ASTN1
AGR2	ACO2	ABL2	AGO1	ARRB1	AIRE	AIFM1	AP2M1	AGR2	AKT1	AHI1	APMAP	ADAM21	ACLY	ATG14
AHSA1	ACP5	ACADS	AGO2	ATXN1	AKT1	AIMP2	ARAF	AHCYL2	ALKBH3	AIFM1	ASB10	ADAMTS1	ACOT9	ATG16L1
AIFM1	ACTB	ACAT1	AGO3	ATXN3	ANKRD55	AIRE	ARIH2	AHI1	AMELY	AIMP2	ASB16	ADAMTS18	ACP3	BCAM
AIMP2	ACTG1	ACLY	AHI1	AURKA	AP3D1	AKT1	ARRB1	AHSA1	ANKRD55	AKAP8	ASH2L	AGT	ACTA2	BCAS2
AIRE	ADAM21	ACO2	AIFM1	BRAF	AR	ANKRD55	ATXN1	AICDA	APP	AKT1	ATP7B	AHNAK	ACTBL2	BICD1
AKT1	ADAMTS1	ACOT9	AIMP2	BRD4	ARAF	AP2A1	ATXN3	AIMP2	ARAF	ALKBH3	ATR	AIF1	ACTN1	BRCC3
AKTIP	ADAMTS18	ACP3	AKAP8	BRD7	ARIH2	AP2M1	AURKA	AIRE	ARIH2	AMELY	BANF1	Akt	ACTN4	BRME1
ANKRD55	ADRB2	ACTA2	AKT1	CAND1	ARRB1	AP3D1	AURKB	AKT1	ARRB1	ANKRD55	BCL2	ALG13	ACTR2	C2orf68
ANO7	ADSL	ACTB	ALKBH3	CBL	ARRB2	AR	BAP1	ALB	ATXN1	AP2M1	BCL2L12	ALS2	ADO	CACNG8
ANXA1	AGO4	ACTBL2	AMELY	CDC20	ASAP3	ARAF	BCL2L1	ALKBH3	ATXN3	APP	BET1	AMELX	AGPAT3	CBS/CBSL
AP2A1	AGR2	ACTG1	ANAPC1	CDH1	ATXN1	ARIH2	BECN1	AMBRA1	AURKA	ARAF	BMI1	AMFR	AGRN	CDC16
AP2M1	AGT	ACTN1	ANAPC4	CDK9	ATXN3	ARNT	BRAF	AMELY	AURKB	ARGLU1	BNIP2	AMIGO1	AHR	CDC27
AP3D1	AHCYL2	ACTN4	ANAPC5	CDKN1A	AURKA	ARRB1	BRD4	ANKRD55	BECN1	ARIH2	CAB39	ANGPTL2	AIPL1	CDKN3
APAF1	AHI1	ACTR2	ANKRD55	CEP250	AURKB	ARRB2	BRD7	AP3D1	BIRC3	ARRB1	CCL3	ANKRD46	AK6	CEP164
APEX1	AHNAK	ADO	AP2M1	CFTR	BAG2	ATXN1	C17orf49	APBB1	BLK	ATP5F1A	CD93	ANO3	AKAP1	CFAP410
APMAP	AHSA1	ADSL	APP	CHD3	BAG3	ATXN3	CAND1	APOB	BRAF	ATXN1	CD96	ANTXR1	AKAP5	CHMP4C
AR	AICDA	ADSS2	ARAF	CHD4	BAG5	AURKA	CBL	APP	BRCA1	ATXN3	CDC37L1	APC	AKAP7	CHUK
ARAF	AIF1	AGO1	ARGLU1	CIC	BAG6	AXL	CDC20	AR	BRD4	AURKA	CEP97	APEX2	AKAP9	CNDP2
ARIH2	AIMP2	AGO2	ARIH2	COPS5	BECN1	BAD	CDH1	ARAF	BRD7	BIRC3	CER1	APOA1	AKAP8L	COX5A
ARNT	AIRE	AGO4	ARRB1	COPS6	BMX	BAG1	CDK9	ARIH2	C1QBP	BRAF	CHORDC1	ARHGAP39	ALAD	CRNKL1
ARRB1	AKT1	AGPAT3	ASTN1	CRK	BRAF	BAG2	CDKN1A	ARRB1	CAND1	BRCA1	Ck2	ARL6IP4	ALDH1A2	CRYL1
ARRB2	Akt	AGR2	ATG14	CSK	BRD4	BAG3	CEBPB	ARRB2	CBL	BRD4	CREB1	ARMC8	ALDH3A2	CTTN
ASAP3	ALB	AGRN	ATG16L1	CTNNB1	BRD7	BAG4	CEP57	ASAH1	CCDC8	BRD7	DAB2	ARMC12	ALOXE3	DAP3
ASB10	ALG13	AHCYL2	ATP5F1A	CUL1	CAND1	BAG5	CEP76	ATAD3A	CDC20	C17orf49	DCP1A	ARSI	AMT	DDHD2
ASB16	ALKBH3	AHI1	ATXN1	CUL2	CBL	BCL9	CEP250	ATXN1	CDC73	C1QBP	DIS3L	ARVCF	AMZ2	DDX5
ASH2L	ALS2	AHR	ATXN3	CUL3	CDC20	BMX	CFTR	ATXN3	CDH1	CAND1	DNAAF4	ASGR1	ANKHD1/ANKHD1-EIF4EBP3	DNAJC19
ATP7B	AMBRA1	AHSA1	AURKA	CUL5	CDC34	BRAF	CHD3	ATXN10	CDK2	CARM1	DNAJB5	ASGR2	ANKRD40	DNLZ
ATR	AMELX	AICDA	AURKB	CUL4A	CDC37	BRD4	CHD4	AURKA	CDK9	CBL	DNAJB7	ASPH	AP2B1	EEF1A
ATXN1	AMELY	AIFM1	BAP1	CUL4B	CDH1	BRD7	CIC	BAG2	CDKN1A	CBLB	DNAJB8	ASPHD2	APBB2	EPHB6
ATXN3	AMFR	AIMP2	BCAM	CYLD	CDK9	C17orf49	CLTC	BAG3	CEBPA	CCND1	DNAJC17	ASTL	APOE	F11
AURKA	AMIGO1	AIPL1	BCAS2	DCUN1D1	CDKN1A	CAND1	COPS5	BAG5	CEBPB	CD74	ECI301	ATF6	APPBP2	FAM167A
AURKB	ANGPTL2	AIRE	BCL2L1	DUSP6	CEBPB	CARD16	COPS6	BCOR	CEP57	CDC20	ECPAS	ATF6B	AQP2	FBXO33
AXL	ANKRD46	AK6	BECN1	EFTUD2	CEP57	CBL	CRK	BIRC3	CEP76	CDC73	EDC3	ATL3	ARFIP1	FGF1
BAD	ANKRD55	AKAP1	BICD1	EGFR	CEP72	CCAR2	CSK	BMPR1A	CEP250	CDH1	EZR	ATP6AP1	ARHGEF2	FGF11
BAG1	ANO3	AKAP5	BIRC3	ELK1	CEP76	CCDC117	CTNNB1	BMX	CFTR	CDK2	F2RL1	ATP6V0A1	ARHGEF10	FXR1
BAG2	ANTXR1	AKAP7	BLK	EPS15	CEP250	CCNI2	CUL1	BRAF	CHD3	CDK9	FBL	ATP6V0C	ARHGEF16	FXYD1
BAG3	AP3D1	AKAP8	BRAF	ESR1	CFTR	CCT4	CUL2	BRCA1	CHD4	CDKN1A	FCHSD1	ATP6V1F	ARMC1	G3BP1
BAG4	APBB1	AKAP9	BRCA1	ESRRB	CHD3	CDC20	CUL3	BRD4	CIBAR1	CDKN2A	FLCN	B3GLCT	ASMTL	GLRX5
BAG5	APC	AKAP8L	BRCC3	FAF1	CHD4	CDC34	CUL5	BRD7	CIC	CEBPA	FLNA	B4GALNT4	ASNS	GLS
BAG6	APEX2	AKT1	BRD4	FANCD2	CIC	CDC37	CUL4A	BSG	CKAP5	CEP250	FNBP1	B4GALT4	ASS1	GNE
BANF1	APOA1	ALAD	BRD7	FBXO6	CLRN1	CDCA5	CUL4B	C1QBP	COPS5	CFTR	FNIP2	BACE1	ATAD3C	GNPAT
BAP1	APOB	ALB	BRME1	FN1	CLUAP1	CDH1	CYLD	CAD	COPS6	CHD3	FOS	BCAR1	ATE1	GOLGA3
BCL2	APP	ALDH1A2	C17orf49	FUS	CNTNAP1	CDK9	DCUN1D1	CALR	CRK	CHD4	FOXP3	BIK	ATF1	GPC1
BCL9	AR	ALDH3A2	C1QBP	GCG	CNTRL	CDKN1A	DDX6	CAMKMT	CSK	CIBAR1	GAB1	BMP1	ATM	GREB1
BCL2L1	ARAF	ALKBH3	C2orf68	GRB2	COPS5	CEP170	DENND2D	CAND1	CTNNB1	CIC	GATA1	BMP4	ATP13A2	GRPEL1
BCL2L12	ARHGAP39	ALOXE3	CACNG8	GRB10	COPS6	CEP250	DNAJA3	CANX	CUL1	CKAP5	Gm21596/Hmgb1	BRPF3	ATP1A2	GRPEL2
BECN1	ARIH2	AMBRA1	CAND1	GRN	CRK	CFTR	DUSP6	CBL	CUL2	CLTC	GZMA	C19orf33	ATP2A2	GRSF1
BET1	ARL6IP4	AMELY	CARM1	GSK3B	CRY1	CHD3	EFTUD2	CBWD1	CUL3	COPS5	H2AC4	CACNA2D1	ATP5F1B	GTF2A1
BMI1	ARMC8	AMT	CBL	H4C1	CSK	CHD4	EGFR	CCS	CUL5	COPS6	HAP1	CALR3	ATXN2	HEATR4
BMX	ARMC12	AMZ2	CBLB	HAUS2	CTNNB1	CIC	ELK1	CDC20	CUL7	CORO2A	HIPK2	CALU	ATXN7	HINT2
BNIP2	ARRB1	ANKHD1/ANKHD1-EIF4EBP3	CBS/CBSL	HCK	CUL1	CLTC	EPS15	CDC34	CUL4A	CRK	HMGA1	CARNMT1	BAX	HSCB
BRAF	ARRB2	ANKRD40	CCDC8	HDAC6	CUL2	CLUAP1	ERBB2	CDC37	CUL4B	CSK	IRF1	CASP4	BBS1	Hsp90
BRD4	ARSI	ANKRD55	CCND1	HNRNPA1	CUL3	CNTNAP1	ESR1	CDC73	CWF19L2	CTNNA2	KDM1A	CASP7	BBS2	IMMP2L
BRD7	ARVCF	AP2A1	CD74	HSP90AA1	CUL5	COP1	ESRRB	CDC5L	CYLD	CTNNB1	KIF23	CASP12	BBS4	ISCA1
C17orf49	ASAH1	AP2B1	CDC16	HSP90AB1	CUL4A	COPS5	FAF1	CDH1	DCUN1D1	CUL1	KLHL38	CCDC115	BBS7	ISCU
CAB39	ASAP3	AP2M1	CDC20	HSPA5	CUL4B	COPS6	FANCD2	CDK2	DDX6	CUL2	LDB3	CCDC168	BBS9	ITPR1
CAND1	ASGR1	AP3D1	CDC27	HSPBP1	CYLD	CRK	FBXO6	CDK9	DUSP6	CUL3	LIMS1	CCDC183	BCR	ITPR3
CARD16	ASGR2	APBB1	CDC73	ID2	DCUN1D1	CRY2	FN1	CDKN1A	EED	CUL5	LOX	CCDC85C	BPNT1	KCNJ2
CBL	ASPH	APBB2	CDH1	IKBKG	DDX6	CSK	FUS	CEBPA	EFTUD2	CUL4A	MAGEA3/MAGEA6	CCDC88B	BRAP	KDM3A
CCAR2	ASPHD2	APOB	CDK2	INPPL1	DERL1	CTNNB1	GAN	CEP250	EGFR	CUL4B	MAGI3	CCNJL	BRMS1	LAMTOR5
CCDC117	ASTL	APOE	CDK9	INS	DNAJA1	CUL1	GCG	CFTR	Elf5	CWF19L2	MAP3K5	CD109	BUB1B	LENG8
CCL3	ATAD3A	APP	CDKN3	KSR1	DNAJA4	CUL2	GRB2	CHD3	ELK1	CYLD	MAP3K12	CDKN2AIP	C1orf94	LRRC36
CCNI2	ATF6	APPBP2	CDKN1A	LARP7	DNAJB1	CUL3	GRB10	CHD4	EPS15	DCUN1D1	MAP3K21	CEP70	C20orf96	LYRM7
CCT4	ATF6B	AQP2	CDKN2A	LCK	DNAJB4	CUL5	GRN	CIBAR1	ERBB2	DENND2D	MAPK1	CEP192	C9orf72	MCUR1
CD93	ATL3	AR	CEBPA	LRRK2	DNAJB11	CUL4A	GSK3B	CIC	ERCC6	DNAJA3	MAPK8IP2	CGNL1	C9orf116	MICOS10
CD96	ATP6AP1	ARAF	CEBPB	MAP2K2	DUSP6	CUL4B	H2AX	CIT	ESR1	DNAJC13	MAPKAP1	CGRRF1	CACUL1	MINDY4
CDC20	ATP6V0A1	ARFIP1	CEP57	MAP2K3	DYRK2	CYLD	H4C1	CKAP5	ESRRB	DUSP6	MAPKAPK2	CHAC2	CALCOCO2	MRM1
CDC34	ATP6V0C	ARGLU1	CEP76	MAP3K14	EFTUD2	DCUN1D1	HAUS2	CLUAP1	FAF1	EED	MAX	CHEK1	CALML3	MRPL58
CDC37	ATP6V1F	ARHGEF2	CEP164	MAPK3	EGFR	DENND2D	HCK	CNTNAP1	FANCD2	EFTUD2	MCM3	CHGA	Calmodulin	MRRF
CDC37L1	ATXN1	ARHGEF10	CEP250	MCM2	ELK1	DERL1	HDAC5	COPS5	FBXO6	EGFR	MDC1	CISD2	CAMK2A	MTBP
CDCA5	ATXN3	ARHGEF16	CFAP410	METTL3	EPS15	DHX15	HDAC6	COPS6	FBXO7	ELK1	MFHAS1	CLASP2	CAMK2D	MTG2
CDH1	ATXN10	ARIH2	CFTR	METTL14	ERBB2	DNAJA1	HNRNPA1	CRK	FBXO25	EPRS1	MFN2	CLEC14A	CAMK2G	MTIF2
CDK9	AURKA	ARMC1	CHD3	METTL21A	ERBB3	DNAJA2	HSP90AA1	CSK	FN1	EPS15	MLST8	CLEC18A/CLEC18C	CAPG	MTRF1L
CDKN1A	AURKB	ARNT	CHD4	MYC	ERRFI1	DNAJA3	HSP90AB1	CTCF	FUS	ESR1	MNDA	CLIP1	CAPZA1	MVD
CEBPB	B3GLCT	ARRB1	CHMP4C	NEDD8	ESR1	DNAJA4	HSPA5	CTNNB1	GCG	ESRRB	MPDZ	CLU	CAPZB	MYCBP2
CEP57	B4GALNT4	ARRB2	CHUK	NFATC2	ESRRB	DNAJB1	HSPBP1	CUL1	GJA1	FAF1	MSR1	CNPY2	CAVIN1	NDUFS1
CEP72	B4GALT4	ASAH1	CIBAR1	NFX1	EWSR1	DNAJB4	HSPD1	CUL2	GPX7	FAM199X	MTOR	CNPY4	CBLIF	NDUFS7
CEP76	BACE1	ASMTL	CIC	NME1	FAF1	DNAJB6	HYPK	CUL3	GRB2	FANCD2	MYBPC2	COBLL1	CBX5	NDUFS8
CEP97	BAG2	ASNS	CKAP5	NPHP4	FANCD2	DNAJB11	ID2	CUL5	GRB10	FBXO6	MYH3	COCH	CCT2	NDUFV1
CEP170	BAG3	ASS1	CLTC	NR2C2	FBXO6	DNAJB12	IKBKG	CUL4A	GRIA1	FBXO25	MYSM1	COL14A1	CCT3	NDUFV2
CEP250	BAG5	ATAD3A	CNDP2	NTRK1	FMNL1	DNAJC5	INPPL1	CUL4B	GRIA2	FN1	NADSYN1	COL1A1	CCT5	NEK1
CER1	BAG6	ATAD3C	COPS5	ODF2	FN1	DNAJC7	INS	CWF19L2	GRIA3	FOXRED1	NEB	COL1A2	CCT7	NEK4
CFTR	BCAR1	ATE1	COPS6	OTUB1	FNIP1	DNAJC9	ITGA2B	CYLD	GRN	FUNDC1	NEK8	COLEC11	CCT8	NELFB
CHD3	BCOR	ATF1	CORO2A	PAN2	FUS	DUSP6	KSR1	DCAF4L2	GSK3B	FUS	NHLRC2	collagen type i (family)	CCT6A	NF2
CHD4	BECN1	ATM	COX5A	PDPK1	FYN	DYNC1H1	LARP7	DCUN1D1	H2AX	GAN	NINL	COMP	CD4	NHSL2
CHORDC1	BIK	ATP13A2	CRK	PHB	GCG	DYRK2	LCK	DERL1	H4C1	GCG	NOD1	CPA2	CD5	NRBF2
CIC	BIRC3	ATP1A2	CRNKL1	PIH1D1	GRB2	EEF1A1	LRRK2	DGCR8	HAUS2	GJA1	NOX4	CPA5	CD207	ODAD4
Ck2	BLK	ATP2A2	CRYL1	PINK1	GRB10	EFTUD2	MAP2K1	DNAJA1	HAX1	GLIPR2	NR5A1	CPS1	CDC6	OPTN
CLRN1	BMP1	ATP5F1A	CSK	PLEKHA4	GRN	EGFR	MAP2K2	DNAJA4	HCK	GMNN	OTUD4	CRP	CDC42BPG	OTUB2
CLTC	BMP4	ATP5F1B	CTNNA2	PPARG	GSK3B	EIF4B	MAP2K3	DNAJB1	HDAC5	GPN1	PALS1	CRTAP	CDK3	PAGR1
CLUAP1	BMPR1A	ATXN1	CTNNB1	PRKCZ	H2AX	ELK1	MAP3K14	DNAJB4	HDAC6	GRAP2	PAX8	CRTC3	CDK4	Paxip1
CNTNAP1	BMX	ATXN2	CTTN	PRKDC	H4C1	EMD	MAPK3	DNAJB11	HDGF	GRAP	PGAM5	CSE1L	CDK5	PHF5A
CNTRL	BRAF	ATXN3	CUL1	PRKN	HAUS2	EPS15	MCM2	DNAJC3	HECTD3	GRB2	PGLYRP1	CSF2RB	CDK10	PIK3R4
COP1	BRCA1	ATXN7	CUL2	PRPF8	HCK	ERBB3	MCM5	DOCK4	HEXIM1	GRB10	PGR	CSN1S1	CDK11B	PIP5KL1
COPS5	BRD4	ATXN10	CUL3	PSMA3	HDAC4	ERCC8	METTL3	DPH1	HNRNPA1	GRN	PHLDA1	CTNNA1	CDK5RAP3	PIR
COPS6	BRD7	AURKA	CUL5	PTK6	HDAC5	ERRFI1	METTL14	DPYSL5	HSP90AA1	GSK3B	PMP22	CTSA	CDKL3	PLCB1
CREB1	BRPF3	AXL	CUL7	PTMA	HDAC6	ESR1	METTL21A	DUSP6	HSP90AB1	H3C1	POT1	CTSD	CDKN1B	PMPCB
CRK	BSG	BAD	CUL4A	PTPN11	HEY1	ESRRB	MTF1	DVL2	HSPA5	H4C1	PRKCA	CWC25	CDKN1C	PPP3CB
CRY1	C19orf33	BAG1	CUL4B	PTPRF	HNRNPA1	EWSR1	MYC	DYRK2	HSPA9	HACE1	PRPF31	DCD	CEMIP	PRCC
CRY2	C1QBP	BAG2	CWF19L2	PXN	HNRNPA3	EZH2	NCL	ECD	HSPBP1	HAUS2	PRR5	DCP2	CENPA	PRKD2
CSK	CACNA2D1	BAG3	CYLD	RBX1	HSP90AA1	FAF1	NEDD1	EDEM3	ID2	HCK	PSEN2	DCTN1	CEP131	PSAP
CTNNB1	CAD	BAG4	DAP3	RC3H1	HSP90AB1	FANCC	NEDD8	EDRF1	IKBKB	HDAC6	PSTPIP1	DCTN2	CEP290	RAD51
CUL1	CALR3	BAG5	DCUN1D1	RC3H2	HSPA2	FANCD2	NFATC2	EED	IKBKG	HEXIM1	PTK2	DDIT3	CFAP52	RBM17
CUL2	CALR	BAX	DDHD2	RECQL4	HSPA5	FBXO6	NFX1	EEF1AKMT3	INPPL1	HNRNPA1	PTPN6	DDX24	CFAP74	RD3L
CUL3	CALU	BBS1	DDX5	RELA	HSPA8	FGFR3	NME1	EFTUD2	INS	Hsp70	RAB11A	DDX41	CFAP298	RNH1
CUL5	CAMKMT	BBS2	DDX6	REST	HSPA1A/HSPA1B	FKBP5	NPHP4	EGFR	INVS	HSP90AA1	RAB3A	DHH	CHAF1A	RPL7
CUL4A	CAND1	BBS4	DENND2D	RNF31	Hspa1b	FN1	NR2C2	EIF3D	IQCB1	HSP90AB1	RAB3IP	DMKN	CHD1L	RPUSD4
CUL4B	CANX	BBS7	DNAJA3	RPS6KA3	HSPA4L	FUS	NTRK1	EIF4G1	KCNMA1	HSPA5	RAB9A	DMP1	CHI3L1	RXRA
CYLD	CARNMT1	BBS9	DNAJC13	RPS6KB2	HSPB1	FYN	ODF2	EIF4G2	KCTD15	HSPA9	RALGAPA1	DNAJB9	CIDEC	SDHAF1
DAB2	CASP4	BCL9	DNAJC19	RUNX1	HSPBP1	GAK	OTUB1	ELK1	KHDRBS1	HSPBP1	RALGAPA2	DNAJC1	CITED1	SDHB
DCP1A	CASP7	BCOR	DNLZ	SH3KBP1	HSPH1	GAN	PAN2	EML4-ALK	KLHL15	HSPD1	RALGAPB	DNAJC10	CKB	SHPRH
DCUN1D1	CASP12	BCR	DUSP6	SHC1	ID2	GCG	PDPK1	ENDOG	KSR1	HYPK	RAPGEF2	DNAJC12	Clathrin	SIRT7
DDX6	CBL	BIRC3	EED	SIRPA	IKBKG	GDI1	PHB	EP300	LARP7	ID2	RBBP5	DNASE1L1	CLTA	SLAIN1
DENND2D	CBWD1	BMPR1A	EEF1A	SMURF1	INPPL1	GOPC	PIH1D1	EPS15	LCK	IKBKB	RBM10	DNASE1L2	CLTB	SLC25A13
DERL1	CCDC8	BMX	EFTUD2	SNCA	INS	GPR37	PIK3C3	ERBB3	LRRK2	IKBKE	RBM45	DNHD1	CLTCL1	SLK
DHX15	CCDC115	BPNT1	EGFR	SOD1	INSIG2	GRB2	PINK1	ERLIN2	MANF	IKBKG	RICTOR	DNMT1	CLUH	SMG6
DIS3L	CCDC168	BRAF	Elf5	SRC	ITFG1	GRB10	PLEKHA4	ERRFI1	MAP2K2	INPPL1	RMND5A	DOCK9	CNN2	SNX27
DNAAF4	CCDC183	BRAP	ELK1	STAU1	KNSTRN	GRN	PLK1	ESR1	MAP2K3	INS	RNGTT	DPEP2	CNN3	TBL1X
DNAJA1	CCDC85C	BRCA1	EPHB6	STUB1	KSR1	GSK3B	PPARG	ESRRB	MAP3K1	INVS	ROCK1	DPEP3	CNOT2	TBPL1
DNAJA2	CCDC88B	BRD4	EPRS1	SUMO2	LARP7	H3C15	PRKCZ	ETFBKMT	MAP3K3	IQCB1	RPAP3	DSP	CNOT3	TBRG4
DNAJA3	CCNJL	BRD7	EPS15	TFCP2	LCK	H4C1	PRKDC	EWSR1	MAP3K7	KCNMA1	S100A1	DUSP4	COL7A1	TEFM
DNAJA4	CCS	BRMS1	ERBB2	TGFB1	LGALS3BP	HAUS1	PRKN	FAF1	MAP3K8	KCTD15	SAE1	ECM1	COLEC12	TIA1
DNAJB1	CD109	BSG	ERCC6	TNFRSF1A	LRRK2	HAUS2	PRMT8	FAM187B	MAP3K14	KIAA1191	SETD1A	EDC4	COPA	TIMM44
DNAJB4	CDC20	BUB1B	ESR1	TP53	MAP1LC3A	HCK	PRPF8	FANCD2	MAPK3	KLHDC2	SGCG	EDEM1	COPE	TKTL2
DNAJB5	CDC34	C17orf49	ESRRB	TUBG1	MAP2K2	HDAC1	PSMA3	FASN	MAT2B	KLHL15	SH2D1B	EDEM2	COPG1	TMEM41B
DNAJB6	CDC37	C1orf94	F11	TUBGCP2	MAP2K3	HDAC4	PTK6	FBXO6	MATK	KRAS	SLC13A1	EEF2KMT	COPS3	TP73
DNAJB7	CDC73	C1QBP	FAF1	TUBGCP4	MAP3K14	HDAC6	PTMA	FBXO25	MCM2	KSR1	SLC5A1	EFEMP1	COPS4	TPM2
DNAJB8	CDC5L	C20orf96	FAM167A	U2AF2	MAPK3	HEMGN	PTPN11	FN1	MEPCE	LARP7	SLC8A1	EGFL6	COPZ1	TPM4
DNAJB11	CDH1	C9orf72	FAM199X	UBASH3B	MAPK7	HEY1	PTPRF	FUS	METTL3	LCK	SMARCA4	EIF2AK3	CORO1A	TPPP
DNAJB12	CDK2	C9orf116	FANCD2	UBE2M	MAPRE1	HIKESHI	PXN	FYN	METTL14	LRRK2	SMARCC1	EIPR1	CPA4	TPT1
DNAJC5	CDK9	CACUL1	FBXO6	UBL4A	MAPT	HNRNPA1	RAD18	GCG	METTL21A	MAP2K1	SNCB	EMC3	CPLX4	TRAP1
DNAJC7	CDKN1A	CAD	FBXO7	UBQLN2	MCM2	HSF1	RASA1	GFAP	MKS1	MAP2K2	SOX9	EMC4	CPSF1	TRHDE
DNAJC9	CDKN2AIP	CALCOCO2	FBXO25	VIRMA	METTL3	HSP90AA1	RBX1	GJA1	MTNR1A	MAP2K3	SP100	EMC8	CPSF7	TSFM
DNAJC17	CEBPA	CALML3	FBXO33	WTAP	METTL14	HSP90AB1	RC3H1	GLIPR1	MTNR1B	MAP3K1	SSTR3	EMILIN3	CREBBP	TTLL5
DUSP6	CEBPB	Calmodulin	FGF1	YAP1	METTL21A	HSPA2	RC3H2	GRB2	MYC	MAP3K3	STK11	ENTPD7	CREBRF	TUBA1C
DYNC1H1	CEP57	CALR	FGF11	YWHAZ	MYC	HSPA5	RECQL4	GRB10	NCL	MAP3K7	STRADA	EPHA4	CRKL	TUBA3C/TUBA3D
DYRK2	CEP70	CAMK2A	FN1	ZC3H18	NCL	HSPA8	RELA	GRN	NEDD8	MAP3K8	STRADB	EPHA7	CRYAB	UBXN2A
ECI301	CEP72	CAMK2D	FOXRED1	ZNF598	NDN	HSPA1A/HSPA1B	REST	GSK3B	NEK2	MAP3K14	SULT1C4	EPPIN	CRYBG3	UQCRC2
ECPAS	CEP76	CAMK2G	FUNDC1		NEDD8	Hspa1b	RIOK1	GSTM5	NFATC1	MAPK3	SUZ12	EPS15L1	CRYZL1	UQCRFS1
EDC3	CEP192	CAMKMT	FUS		NFATC2	HSPA1L	RNF31	H4C1	NFATC2	MAVS	TELO2	ERC1	CSDE1	USP15
EEF1A1	CEP250	CAND1	FXR1		NFX1	HSPA4L	RPS6KA3	HAUS2	NFKB2	MCCC1	TERF2	ERF	CSNK1D	UVRAG
EFTUD2	CFTR	CANX	FXYD1		NME1	HSPBP1	RPS6KB2	HCFC1	NFKBIA	MCM2	TERF2IP	ERGIC2	CSNK1E	VCPKMT
EGFR	CGNL1	CAPG	G3BP1		NME1-NME2	HSPD1	RUNX1	HCK	NFKBIB	MCM5	TERT	ERLEC1	CSNK2A1	VDAC1
EIF4B	CGRRF1	CAPZA1	GAN		NPHP4	HSPH1	SH3KBP1	HDAC2	NFKBIE	MDN1	TFIP11	ERN1	CSNK2A2	YBX1
ELK1	CHAC2	CAPZB	GCG		NPM1	HTT	SHC1	HDAC4	NFX1	MED9	TGOLN2	ERN2	CSNK2B	YKT6
EMD	CHD3	CARD16	GJA1		NR2C2	HYPK	SIRPA	HDAC6	NGB	MEPCE	THRA	ERP29	CST6	YME1L1
EPS15	CHD4	CARM1	GLIPR2		NR3C1	ID2	SMURF1	HEXIM1	NME1	METTL3	THRB	ETV3	CSTF3	ZFYVE27
ERBB2	CHEK1	CAVIN1	GLRX5		NTRK1	IKBKG	SNCA	HEY1	NOS2	METTL14	TINF2	FAF2	CTBP2
ERBB3	CHGA	CBL	GLS		ODF2	ILF2	SOD1	HLA-DRB5	NPHP1	METTL21A	TJP1	FAM120A	CTH
ERCC8	CIBAR1	CBLB	GMNN		OTUB1	INPPL1	SPRTN	HMGB1	NPHP4	MKS1	TJP2	FAM169A	CTNND1
ERRFI1	CIC	CBLIF	GNE		PA2G4	INS	SRC	HNRNPA1	NR2C2	MTF1	TMEM102	FAM8A1	CTSH
ESR1	CISD2	CBWD1	GNPAT		PAN2	INSIG2	STAU1	HNRNPD	NTRK1	MTNR1A	TNIP2	FAS	CYB5R3
ESRRB	CIT	CBX5	GOLGA3		PDPK1	ISG15	STUB1	HSP90AA1	OBSL1	MYC	TRAPPC1	FBLN7	CYCS
EWSR1	CKAP5	CCAR2	GPC1		PHB	ITFG1	SUMO2	HSP90AB1	ODF2	NANOG	TRAPPC2	FCHSD2	CYFIP1
EZH2	CLASP2	CCDC117	GPN1		PIH1D1	ITGA4	TET2	HSPA2	OTUB1	NEDD8	TRAPPC3	FKBP7	CYFIP2
EZR	CLEC14A	CCND1	GPX7		PIK3C3	JUN	TFCP2	HSPA4	PALLD	NEK2	TRAPPC5	FKBP10	CYP3A4
F2RL1	CLEC18A/CLEC18C	CCNI2	GRAP2		PINK1	KATNA1	TGFB1	HSPA5	PAN2	NFATC2	TRAPPC9	FKBP14	CYP8B1
FAF1	CLIP1	CCS	GRAP		PLEKHA4	KCNH2	TNFRSF1A	HSPA8	PARK7	NFKB2	TRAPPC10	FUCA2	DARS1
FANCC	CLRN1	CCT2	GRB2		PLG	KLHL34	TNK2	HSPA9	PDPK1	NFKBIA	TRAPPC2L	GAB2	DCDC2B
FANCD2	CLU	CCT3	GRB10		PPARG	KNSTRN	TP53	HSPA1A/HSPA1B	PHB	NFKBIB	TRAPPC6A	GALNS	DDB1
FBL	CLUAP1	CCT4	GREB1		PPIA	KSR1	TP53BP1	Hspa1b	PI3K p85	NFKBIE	TRAPPC6B	GAP43	DDC
FBXO6	CNPY2	CCT5	GRIA1		PPP6C	LARP7	TRAF3IP1	HSPA4L	PIH1D1	NFX1	TTI1	GAS6	DDRGK1
FCHSD1	CNPY4	CCT7	GRIA2		PPT1	LCK	TUBG1	HSPBP1	PIK3C3	NME1	TTI2	GCA	DDX1
FGFR3	CNTNAP1	CCT8	GRIA3		PRKAA1	LGALS3BP	TUBGCP2	HSPH1	PINK1	NOL8	TTN	GHITM	DDX11
FKBP5	CNTRL	CCT6A	GRN		PRKCZ	LMAN1	TUBGCP4	HUWE1	PLEKHA4	NPHP1	TXLNG	GINM1	DDX17
FLCN	COBLL1	CD4	GRPEL1		PRKDC	LRRC28	U2AF2	HYOU1	PPARG	NPHP4	UBA1	GLB1	DDX59
FLNA	COCH	CD5	GRPEL2		PRKN	LRRK2	UBASH3A	ID2	PPP1CA	NR2C2	UBE2N	GLB1L2	DDX39B
FMNL1	COL14A1	CD74	GRSF1		PRNP	MAP2K1	UBASH3B	IDE	PRDM1	NTRK1	UBTF	GLB1L3	DENND1C
FN1	COL1A1	CD207	GSK3B		PRPF8	MAP2K2	UBE2M	IGF1R	PRKAB1	ODF2	UBXN6	GLI4	DENND4C
FNBP1	COL1A2	CDC6	GTF2A1		PSEN1	MAP2K3	UBL4A	IKBKB	PRKCZ	OTUB1	UHRF1	GLT8D2	DES
FNIP1	COLEC11	CDC20	H2AX		PSMA3	MAP2K5	UBQLN2	IKBKG	PRKDC	PAN2	UNC45A	GNAQ	DET1
FNIP2	collagen type i (family)	CDC34	H3C1		PSMC5	MAP3K14	VCAM1	INA	PRKN	PDPK1	USP19	GNRH1	DHX9
FOS	COMP	CDC37	H4C1		PSMD14	MAPK3	VIRMA	INPPL1	PRPF8	PFN1	WDR77	GOLPH3L	DHX57
FOXP3	COPS5	CDC73	HACE1		PTEN	MAPK7	WTAP	INS	PSMA3	PHB	WDTC1	GPATCH3	DIAPH1
FUS	COPS6	CDC42BPG	HAUS2		PTK6	MAPK14	XRCC6	INSIG2	PTK6	PI3K p85	XIAP	GPRASP1	DIO3
FYN	CPA2	CDC5L	HAX1		PTMA	MAPT	YAP1	INVS	PTMA	PIH1D1	XRCC5	H3C6	DIP2A
GAB1	CPA5	CDCA5	HCK		PTPN11	MATR3	YWHAG	IQCB1	PTPN11	PINK1	ZNF20	HAPLN3	DIRAS1
GAK	CPS1	CDH1	HDAC5		PTPRF	MCL1	YWHAZ	ITFG1	PTPRF	PLEKHA4	ZNF25	HELLS	DMWD
GAN	CRK	CDK2	HDAC6		PXN	MCM2	ZC3H18	ITM2B	PXN	POU5F1		HLA-B	DNAAF2
GATA1	CRP	CDK3	HDGF		RAD50	MCM5	ZNF598	KCND3	RBX1	PPARG		HLA-C	DNAH1
GCG	CRTAP	CDK4	HEATR4		RAF1	MED12		KCNJ11	RC3H1	PPP1CA		HNF1B	DNAJ
GDI1	CRTC3	CDK5	HECTD3		RBP3	METTL3		KCNMA1	RC3H2	PPP1R9B		HNRNPA1L2	DNAJB2
Gm21596/Hmgb1	CRY1	CDK9	HEXIM1		RBX1	METTL14		KCTD15	RECQL4	PRDX1		HNRNPA2B1	DNAJB14
GOPC	CSE1L	CDK10	HINT2		RC3H1	METTL21A		KLHL15	REL	PRKAB1		HNRNPAB	DNAJC6
GPR37	CSF2RB	CDK11B	HNRNPA1		RC3H2	MLF2		KNSTRN	RELA	PRKCZ		HNRNPDL	DNAJC11
GRB2	CSK	CDK5RAP3	HSCB		RECQL4	MME		KRT17	RELB	PRKDC		HNRNPH1	DNM1
GRB10	CSN1S1	CDKL3	Hsp70		RELA	MTF1		KSR1	REST	PRKN		HNRNPH2	DNM2
GRN	CTCF	CDKN1A	Hsp90		REST	MYC		LARP7	RIOK1	PRPF8		HNRNPH3	DOC2A
GSK3B	CTNNA1	CDKN1B	HSP90AA1		RIOK1	MYLK2		LCK	RIPK1	PSMA3		HNRNPU	DOCK5
GZMA	CTNNB1	CDKN1C	HSP90AB1		RNF31	NDN		LGALS3BP	RIPK3	PTK6		HS3ST2	DPH2
H2AC4	CTSA	CDKN2A	HSPA5		RPS6KA1	NEDD8		LIPC	RNF4	PTMA		HSP90B1	DPP3
H2AX	CTSD	CEBPA	HSPA9		RPS6KA3	NFATC2		LRRK2	RNF31	PTPN11		IDS	DPP8
H3C15	CUL1	CEMIP	HSPBP1		RPS6KB2	NFX1		MAGED2	RNF146	PTPRF		IFI6	DPYSL2
H4C1	CUL2	CENPA	HSPD1		RUNX1	NME1		MAP2K2	RPS6KA3	PXN		IGFBP3	DRG2
HAP1	CUL3	CEP131	HYPK		RUVBL2	NME1-NME2		MAP2K3	RPS6KB2	RARA		IGH	Dynamin
HAUS1	CUL5	CEP170	ID2		SH3KBP1	NMRAL1		MAP3K1	RSRC1	RASA1		Igh (family)	DYNLL1
HAUS2	CUL7	CEP250	IKBKB		SHC1	NPHP4		MAP3K3	RUNX1	RBX1		Ighd	DYNLT2B
HCK	CUL4A	CEP290	IKBKE		SIRPA	NR2C2		MAP3K7	SH3KBP1	RC3H1		IGHM	EBNA1BP2
HDAC1	CUL4B	CFAP52	IKBKG		SMURF1	NTRK1		MAP3K8	SHC1	RC3H2		IGK	EEF1A2
HDAC4	CWC25	CFAP74	IMMP2L		SNCA	ODF2		MAP3K14	SIRPA	RECQL4		IGKC	EEF1D
HDAC5	CWF19L2	CFAP298	INPPL1		SOD1	OTUB1		MAPK3	SIRT1	REL		IL24	EFCAB7
HDAC6	CYLD	CFTR	INS		SPDL1	PACSIN1		MAPK7	SIRT3	RELA		IL12RB1	EFHD1
HEMGN	DCAF4L2	CHAF1A	INVS		SQSTM1	PACSIN2		MAPT	SKI	RELB		Immunoglobulin	EGLN3
HEY1	DCD	CHD3	IQCB1		SRC	PACSIN3		MCM2	SLC25A5	REST		ING3	EIF5
HIKESHI	DCP2	CHD4	ISCA1		STAU1	PAK1		MEPCE	SMURF1	RIPK1		INHA	EIF2AK1
HIPK2	DCTN1	CHD1L	ISCU		STIP1	PAN2		METTL3	SNAI1	RIPK3		INHBE	EIF2AK2
HMGA1	DCTN2	CHI3L1	ITGA2B		STUB1	PARP1		METTL14	SNCA	RNF4		INSL6	EIF2AK4
HNRNPA1	DCUN1D1	CIBAR1	ITPR1		SUMO2	PDPK1		METTL22	SOD1	RNF31		INSR	EIF2B2
HNRNPA3	DDIT3	CIC	ITPR3		TAF15	PHB		METTL21A	SOX2	RPL38		IQCC	EIF2B4
HSF1	DDX6	CIDEC	KCNJ2		TCERG1	PIH1D1		METTL21C	SPART	RPS6KA3		ISLR	EIF2D
HSP90AA1	DDX24	CIT	KCNMA1		TFCP2	PIK3R2		MKS1	SRC	RPS6KB2		ISOC2	EIF2S3
HSP90AB1	DDX41	CITED1	KCTD15		TGFB1	PINK1		MOSPD2	STAU1	RRM2		ITGA9	EIF3C
HSPA2	DERL1	CKAP5	KDM3A		TNFRSF1A	PLEKHA4		MPZL1	STUB1	RUNX1		ITGB1	EIF3F
HSPA5	DGCR8	CKB	KHDRBS1		TP53	PPARG		MTCH2	SUFU	SCFD1		ITLN1	EIF3I
HSPA8	DHH	Clathrin	KIAA1191		TRIM29	PPID		MTNR1A	SUMO2	SDHA		ITLN2	EIF3K
HSPA1A/HSPA1B	DMKN	CLTA	KLHDC2		TUBA1A	PPP2R1A		MYC	SUPT6H	SDHAF2		ITM2C	EIF3L
Hspa1b	DMP1	CLTB	KLHL15		TUBG1	PPP5C		MYD88	TAB1	Secretase gamma		JUP	EIF3M
HSPA1L	DNAJA1	CLTC	KRAS		TUBGCP2	PPP6C		NDN	TAB2	SH3KBP1		KIAA2013	EIF4A1
HSPA4L	DNAJA4	CLTCL1	KSR1		TUBGCP3	PPT1		NDRG1	TANK	SHC1		KIF18B	EIF4A2
HSPB1	DNAJB1	CLUAP1	LAMTOR5		TUBGCP4	PRKAA1		NECTIN2	TBK1	SIRPA		KIF2C	EIF4E2
HSPBP1	DNAJB4	CLUH	LARP7		TXNIP	PRKCE		NEDD8	TEDC2	SKI		KIRREL1	EIF4E3
HSPD1	DNAJB9	CNN2	LCK		U2AF2	PRKCG		NEK2	TFCP2	SLC1A5		KLHDC4	EIF4G3
HSPH1	DNAJB11	CNN3	LENG8		UBASH3B	PRKCI		NFATC2	TFE3	SLC25A5		KLHL8	Eif4g
HTT	DNAJC1	CNOT2	LRRC36		UBE2M	PRKCZ		NFKB2	TGFB1	SMURF1		KLK3	EIF4H
HYPK	DNAJC3	CNOT3	LRRK2		UBE3A	PRKDC		NFKBIA	TGM2	SNAI1		KRT8	EIF5B
ID2	DNAJC10	CNTNAP1	LYRM7		UBL4A	PRKN		NFKBIB	TNFRSF1A	SNCA		L3MBTL2	ELAC2
IKBKG	DNAJC12	COL7A1	MANF		UBQLN2	PRMT5		NFKBIE	TNFRSF1B	SOD1		LAMA1	ELP3
ILF2	DNASE1L1	COLEC12	MAP2K1		VCP	PRMT9		NFX1	TP53	SOX2		LAMP1	EMC7
INPPL1	DNASE1L2	COP1	MAP2K2		VHL	PRPF8		NIF3L1	TRAF2	SP1		LCT	ENAH
INS	DNHD1	COPA	MAP2K3		VIRMA	PSEN1		NME1	TRAF6	SPRTN		LDHAL6B	ENO1
INSIG2	DNMT1	COPE	MAP3K1		VWCE	PSMA3		NME1-NME2	TTC23	SRC		LDLR	ENOSF1
IRF1	DOCK4	COPG1	MAP3K3		WTAP	PSMC5		NPHP1	TUBG1	SRPK1		LEMD3	ENTR1
ISG15	DOCK9	COPS3	MAP3K7		WWP2	PSMD14		NPHP4	TUBGCP2	SSX2IP		LGI1	EPB42
ITFG1	DPEP2	COPS4	MAP3K8		YAP1	PTEN		NR2C2	TUBGCP4	STAU1		LIG3	EPS8
ITGA4	DPEP3	COPS5	MAP3K14		YWHAB	PTK6		NTRK1	TUFM	STUB1		LOXL2	ERG
ITGA2B	DPH1	COPS6	MAPK3		YWHAZ	PTMA		ODF2	U2AF2	SUMO2		LOXL3	ERH
JUN	DPYSL5	COPZ1	MAT2B		ZC3H18	PTPN11		OTUB1	UBASH3B	TAB1		LRP1	ESPL1
KATNA1	DSP	CORO1A	MATK		ZNF598	PTPN12		PAN2	UBE2M	TAB2		LRP2	ESR2
KCNH2	DUSP4	CORO2A	MAVS		ZUP1	PTPRF		PARD3	UBL4A	TANK		LRP5	ESRP2
KDM1A	DUSP6	CPA4	MCCC1			PXN		PDPK1	UBQLN2	TBK1		LRP	ESS2
KIF23	DVL2	CPLX4	MCM2			RAD23A		PHB	VIM	TEDC2		LRP1B	ETFA
KLHL34	DYRK2	CPSF1	MCM5			RAF1		PI3K p85	VIRMA	TET2		LRRC32	EXOC3L2
KLHL38	ECD	CPSF7	MCUR1			RASA1		PIH1D1	WTAP	TFCP2		LTBP1	F12
KNSTRN	ECM1	CREBBP	MDN1			RBX1		PINK1	YAP1	TFE3		LYPD1	FAM13A
KSR1	EDC4	CREBRF	MED9			RC3H1		PLEKHA4	YWHAZ	TGFB1		LYZL2	FAM189B
LARP7	EDEM1	CRK	MEPCE			RC3H2		POC1A	ZC3H18	TGM2		MACROD2	FAM3D
LCK	EDEM2	CRKL	METTL3			RECQL4		POC1B	ZNF598	TNFRSF1A		MALSU1	FANCA
LDB3	EDEM3	CRY2	METTL14			RELA		POTEE/POTEF	ZSWIM7	TNFRSF1B		MANEAL	FANCM
LGALS3BP	EDRF1	CRYAB	METTL21A			REST		PPARG	ZZEF1	TP53		MAP4	FARSB
LIMS1	EED	CRYBG3	MICOS10			RHOA		PPIE		TRAF1		MAPK13	FAT3
LMAN1	EEF1AKMT3	CRYZL1	MINDY4			RNF2		PPP1CA		TRAF2		MAPRE3	FAT4
LOX	EEF2KMT	CSDE1	MKS1			RNF31		PPP1CC		TRAF6		MAST1	FBP1
LRRC28	EFEMP1	CSK	MRM1			RNF207		PPP6C		TRAF3IP1		MATN3	FBXO45
LRRK2	EFTUD2	CSNK1D	MRPL58			RPS6KA1		PPT1		TRIM6		MCM8	FBXW7
MAGEA3/MAGEA6	EGFL6	CSNK1E	MRRF			RPS6KA3		PRKAA1		TTC23		METTL18	FCRL3
MAGI3	EGFR	CSNK2A1	MTBP			RPS6KB2		PRKAB1		TUBB4B		METTL23	FDPS
MAP1LC3A	EIF2AK3	CSNK2A2	MTF1			RUNX1		PRKAG1		TUBG1		MEX3C	FECH
MAP2K1	EIF3D	CSNK2B	MTG2			RUVBL1		PRKCZ		TUBGCP2		MFSD12	FHL2
MAP2K2	EIF4G1	CST6	MTIF2			RUVBL2		PRKDC		TUBGCP4		MHC Class I (complex)	FHL3
MAP2K3	EIF4G2	CSTF3	MTNR1A			SENP2		PRKN		TUFM		MIPOL1	FLII
MAP2K5	EIPR1	CTBP2	MTNR1B			SH3BGRL		PRPF8		U2AF2		MMP3	FLYWCH2
MAP3K5	Elf5	CTCF	MTRF1L			SH3KBP1		PSEN1		UBASH3A		MPPE1	FOXC1
MAP3K12	ELK1	CTH	MVD			SHC1		PSMA2		UBASH3B		MRC1	FRA10AC1
MAP3K14	EMC3	CTNNA2	MYC			SIRPA		PSMA3		UBE2M		MSI1	FTL
MAP3K21	EMC4	CTNNB1	MYCBP2			SLC12A3		PSMC5		UBL4A		MSI2	FTO
MAPK1	EMC8	CTNND1	NANOG			SLC27A3		PSMD14		UBQLN2		MTX1	FUZ
MAPK3	EMILIN3	CTSH	NCL			SLC6A4		PTEN		VCAM1		MVK	GABRB1
MAPK7	EML4-ALK	CUL1	NDUFS1			SMURF1		PTK6		VIM		MYH10	GALC
MAPK14	ENDOG	CUL2	NDUFS7			SNCA		PTMA		VIRMA		MYO1F	GANAB
MAPK8IP2	ENTPD7	CUL3	NDUFS8			SNIP1		PTPN11		VRK1		MYORG	GAPDH
MAPKAP1	EP300	CUL5	NDUFV1			SOCS1		PTPRF		WTAP		MZB1	GAPVD1
MAPKAPK2	EPHA4	CUL4A	NDUFV2			SOD1		PXN		XRCC6		N6AMT1	GARS1
MAPRE1	EPHA7	CUL4B	NEDD1			SPATA5L1		RAF1		YAP1		NACC1	GCH1
MAPT	EPPIN	CWF19L2	NEDD8			SPDL1		RBX1		YWHAZ		NAPSA	GDI2
MATR3	EPS15	CYB5R3	NEK1			SPRTN		RC3H1		ZC3H18		NBAS	GFER
MAX	EPS15L1	CYCS	NEK2			SQSTM1		RC3H2		ZFP36L2		NCK1	GFPT1
MCL1	ERBB2	CYFIP1	NEK4			SRC		RECQL4		ZNF598		NCOA1	GK2
MCM2	ERBB3	CYFIP2	NELFB			SRRM2		REL				NCOR2	GLUL
MCM3	ERC1	CYLD	NF2			ST13		RELA				NDUFA3	GM2A
MCM5	ERCC6	CYP3A4	NFATC1			STAU1		RELB				NEFL	GMPPA
MDC1	ERF	CYP8B1	NFATC2			STIP1		REST				NEFM	GNA15
MED12	ERGIC2	DARS1	NFKB2			STUB1		RIPK1				NLGN3	GNAS
METTL3	ERLEC1	DCAF4L2	NFKBIA			SUMO2		RIPK3				NLN	GNB2
METTL14	ERLIN2	DCDC2B	NFKBIB			TAF15		RIPK4				NME4	GNB4
METTL21A	ERN1	DCUN1D1	NFKBIE			TBX3		RNF4				NME6	GOT2
MFHAS1	ERN2	DDB1	NFX1			TCERG1		RNF31				NOL11	GPHN
MFN2	ERP29	DDC	NGB			TET2		RNF123				NPB	GPR6
MLF2	ERRFI1	DDRGK1	NHSL2			TFCP2		RPA1				NPTX1	GPSM3
MLST8	ESR1	DDX1	NME1			TGFB1		RPA2				NRM	GRIK1
MME	ESRRB	DDX11	NOL8			TNFRSF1A		RPA3				NRROS	GRIN1
MNDA	ETFBKMT	DDX17	NOS2			TOMM70		RPL3				NSG2	GRWD1
MPDZ	ETV3	DDX59	NPHP1			TP53		RPL23				NUCB1	GSPT1
MSR1	EWSR1	DDX39B	NPHP4			TRAF3IP1		RPN1				NUP62	GSPT2
MTF1	FAF1	DENND1C	NR2C2			TRAPPC4		RPN2				NYX	GUCY1B1
MTOR	FAF2	DENND2D	NRBF2			TRIM25		RPS6KA1				OMA1	H1-2
MYBPC2	FAM120A	DENND4C	NTRK1			TRIM38		RPS6KA3				OPRM1	H1-4
MYC	FAM169A	DERL1	OBSL1			TSSK6		RPS6KB2				OS9	H1-5
MYH3	FAM187B	DES	ODAD4			TUBA1A		RUNX1				OTUD3	H2AC20
MYLK2	FAM8A1	DET1	ODF2			TUBA1B		RUVBL2				P4HA3	H3-2
MYSM1	FANCD2	DGCR8	OPTN			TUBB		SCRIB				P4HB	H3-4
NADSYN1	FAS	DHX9	OTUB1			TUBG1		SEPTIN2				PAFAH1B1	HAO1
NCL	FASN	DHX15	OTUB2			TUBGCP2		SEPTIN7				PAK2	HAO2
NDN	FBLN7	DHX57	PAGR1			TUBGCP3		SERPINA1				PAT-SM6	HAUS3
NEB	FBXO6	DIAPH1	PALLD			TUBGCP4		SERPINH1				PAWR	HAUS5
NEDD1	FBXO7	DIO3	PAN2			TXNIP		SH3KBP1				PCDHA10	HBA1/HBA2
NEDD8	FBXO25	DIP2A	PARK7			U2AF2		SHC1				PCSK9	HBB
NEK8	FCHSD2	DIRAS1	Paxip1			UBASH3A		SIRPA				PDE10A	HCCS
NFATC2	FKBP7	DMWD	PDPK1			UBASH3B		SKI				PDE3A	HCFC2
NFX1	FKBP10	DNAAF2	PFN1			UBE2M		SLC25A3				PDIA2	HDAC3
NHLRC2	FKBP14	DNAH1	PHB			UBE3A		SLC25A5				PDIA3	HDAC10
NINL	FMNL1	DNAJ	PHF5A			UBL4A		SLC25A6				PDIA4	HDLBP
NME1	FN1	DNAJA1	PI3K p85			UBQLN2		SMURF1				PDIA5	HERC3
NME1-NME2	FNIP1	DNAJA2	PIH1D1			UCHL3		SNAI1				PDIA6	HERC4
NMRAL1	FUCA2	DNAJA3	PIK3C3			USP11		SNCA				PHIP	HERC5
NOD1	FUS	DNAJA4	PIK3R4			USP43		SNW1				PHLDB2	HGS
NOX4	FYN	DNAJB1	PINK1			USP50		SOAT1				PIAS1	HIF1A
NPHP4	GAB2	DNAJB2	PIP5KL1			VCAM1		SOD1				PIGA	HIRA
NPM1	GALNS	DNAJB4	PIR			VCP		SOST				PIK3CA	HK2
NR2C2	GAP43	DNAJB6	PLCB1			VHL		SOX2				PLAA	HLA-DRA
NR3C1	GAS6	DNAJB11	PLEKHA4			VIRMA		SPDL1				PLCL1	HLA-DRB1
NR5A1	GCA	DNAJB12	PLK1			VRK3		SPPL2B				PLP1	HLA-DRB3
NTRK1	GCG	DNAJB14	PMPCB			WDR76		SPTB				PODN	HLA-DRB4
ODF2	GFAP	DNAJC3	POU5F1			WTAP		SQSTM1				PODXL	HLTF
OTUB1	GHITM	DNAJC5	PPARG			WWOX		SRC				POGLUT1	HMCES
OTUD4	GINM1	DNAJC6	PPP1CA			WWP2		STAG1				POGLUT2	HMGB2
PA2G4	GJA1	DNAJC7	PPP1R9B			XRCC6		STAU1				POLK	HNRNPM
PACSIN1	GLB1	DNAJC9	PPP3CB			YAP1		STIP1				POLR3H	HOOK1
PACSIN2	GLB1L2	DNAJC11	PRCC			YES1		STMN1				PON2	HOPX
PACSIN3	GLB1L3	DNAJC13	PRDM1			YWHAB		STUB1				PPIB	HSF2
PAK1	GLI4	DNM1	PRDX1			YWHAE		SUMO2				Ppp1cc	Hsp27
PALS1	GLIPR1	DNM2	PRKAB1			YWHAQ		TAB1				PPP2R2D	HSPA6
PAN2	GLT8D2	DOC2A	PRKCZ			YWHAZ		TAB2				PPP4R4	HSPB2
PARP1	GNAQ	DOCK4	PRKD2			ZBTB7A		TAF15				PRDM16	HTN3
PAX8	GNRH1	DOCK5	PRKDC			ZC3H18		TANK				PRDX4	HTR1E
PDPK1	GOLPH3L	DPH1	PRKN			ZNF598		TARDBP				PRKAB2	IARS1
PGAM5	GPATCH3	DPH2	PRMT8			ZUP1		TBK1				PRKCSH	IER2
PGLYRP1	GPRASP1	DPP3	PRPF8					TCERG1				PRL	IFIH1
PGR	GPX7	DPP8	PSAP					TEDC2				PRMT1	IFT122
PHB	GRB2	DPYSL2	PSMA3					TFCP2				PRMT7	Ikb
PHLDA1	GRB10	DPYSL5	PTK6					TFE3				PROZ	IL16
PIH1D1	GRIA1	DRG2	PTMA					TFEB				PRPF38A	IL32
PIK3C3	GRIA2	DUSP6	PTPN11					TGFB1				PRSS2	IL17RC
PIK3R2	GRIA3	DVL2	PTPRF					TGM2				PRSS50	ILK
PINK1	GRN	Dynamin	PXN					TIMM13				PSMB1	ILRUN
PLEKHA4	GSK3B	DYNC1H1	RAD18					TLR9				PSME3	IMPA2
PLG	GSTM5	DYNLL1	RAD51					TMEM132A				PTCH1	IPPK
PLK1	H2AX	DYNLT2B	RARA					TMPO				PTPRN2	IRAK1
PMP22	H3C6	DYRK2	RASA1					TNFRSF1A				PTPRN	IRS4
POT1	H4C1	EBNA1BP2	RBM17					TNFRSF1B				PTPRO	ISYNA1
PPARG	HAPLN3	ECD	RBX1					TOPBP1				PTRH2	ITSN2
PPIA	HAUS2	EDEM3	RC3H1					TP53				PWP1	IVNS1ABP
PPID	HAX1	EDRF1	RC3H2					TRAF2				RAC3	JAK2
PPP2R1A	HCFC1	EED	RD3L					TRAF6				RALBP1	JMJD4
PPP5C	HCK	EEF1A1	RECQL4					TTC23				RCC1L	KAT5
PPP6C	HDAC2	EEF1A2	REL					TUBA1A				RCN1	KAT2A
PPT1	HDAC4	EEF1AKMT3	RELA					TUBA4A				RCN2	KAT2B
PRKAA1	HDAC5	EEF1D	RELB					TUBB3				REEP6	KBTBD4
PRKCA	HDAC6	EFCAB7	REST					TUBB8				RETN	KCMF1
PRKCE	HDGF	EFHD1	RIOK1					TUBB4A				RNF40	KCNA5
PRKCG	HECTD3	EFTUD2	RIPK1					TUBG1				RNF183	KCNAB2
PRKCI	HELLS	EGFR	RIPK3					TUBGCP2				RPIA	KCNC4
PRKCZ	HEXIM1	EGLN3	RNF4					TUBGCP3				RPL17	KCND2
PRKDC	HEY1	EIF5	RNF31					TUBGCP4				RRAGD	KCNH5
PRKN	HLA-B	EIF2AK1	RNF146					TUFM				RRAS	KCNJ10
PRMT5	HLA-C	EIF2AK2	RNH1					TXNIP				RSPO3	KCNQ4
PRMT8	HLA-DRB5	EIF2AK4	RPL7					U2AF2				RTN2	KCNV2
PRMT9	HMGB1	EIF2B2	RPL38					UBASH3B				SCGB1D1	KCTD2
PRNP	HNF1B	EIF2B4	RPS6KA3					UBC				SCGB1D4	KCTD5
PRPF8	HNRNPA1	EIF2D	RPS6KB2					UBE2M				SDF2	KCTD17
PRPF31	HNRNPA3	EIF2S3	RPUSD4					UBE2S				SDF4	KDM2B
PRR5	HNRNPA1L2	EIF3C	RRM2					UBE3A				SDF2L1	KEAP1
PSEN1	HNRNPA2B1	EIF3D	RSRC1					UBL4A				SEC62	KHDRBS2
PSEN2	HNRNPAB	EIF3F	RUNX1					UBQLN2				SEC63	KIF1B
PSMA3	HNRNPD	EIF3I	RXRA					UBR1				SEC61A1	KIF1C
PSMC5	HNRNPDL	EIF3K	SCFD1					VCP				SEL1L	KIF5B
PSMD14	HNRNPH1	EIF3L	SDHA					VHL				SELENOS	KIFBP
PSTPIP1	HNRNPH2	EIF3M	SDHAF1					VIM				SENP5	KLC1
PTEN	HNRNPH3	EIF4A1	SDHAF2					VIRMA				SEPTIN6	KLC2
PTK2	HNRNPU	EIF4A2	SDHB					VRK2				SEPTIN9	KLHL10
PTK6	HS3ST2	EIF4B	Secretase gamma					VSIG8				SEPTIN10	KLHL36
PTMA	HSP90AA1	EIF4E2	SH3KBP1					WAPL				SERPINB5	KPNA4
PTPN6	HSP90AB1	EIF4E3	SHC1					WDFY4				SERPINB11	KPNA5
PTPN11	HSP90B1	EIF4G1	SHPRH					WTAP				SERPINF1	KPNA6
PTPN12	HSPA2	EIF4G2	SIRPA					WWP2				SET	KRT18
PTPRF	HSPA4	EIF4G3	SIRT1					YAF2				SFTPC	LALBA
PXN	HSPA5	Eif4g	SIRT3					YAP1				SH3BP4	LAMP2
RAB11A	HSPA8	EIF4H	SIRT7					YWHAB				SIAH2	LARP1
RAB3A	HSPA9	EIF5B	SKI					YWHAZ				SIGLEC10	LARP1B
RAB3IP	HSPA1A/HSPA1B	ELAC2	SLAIN1					ZC3H18				SIGLEC12	LARS1
RAB9A	Hspa1b	ELK1	SLC1A5					ZFYVE21				SIGLEC16	LAX1
RAD18	HSPA4L	ELP3	SLC25A5					ZNF598				SIGMAR1	LDHA
RAD50	HSPB1	EMC7	SLC25A13					ZUP1				SIL1	LOC102724788/PRODH
RAD23A	HSPBP1	EMD	SLK									SLC16A10	LPGAT1
RAF1	HSPH1	EML4-ALK	SMG6									SLC22A8	LRPPRC
RALGAPA1	HUWE1	ENAH	SMURF1									SLC39A11	LRRC56
RALGAPA2	HYOU1	ENDOG	SNAI1									SLC6A6	LRRFIP2
RALGAPB	ID2	ENO1	SNCA									SLC7A8	LRRK1
RAPGEF2	IDE	ENOSF1	SNX27									SLN	LSM12
RASA1	IDS	ENTR1	SOD1									SMARCA2	LUZP1
RBBP5	IFI6	EP300	SOX2									SMOX	LZTR1
RBM10	IGF1R	EPB42	SP1									SMPD1	MAD1L1
RBM45	IGFBP3	EPRS1	SPART									SMPD2	MAPK6
RBP3	IGH	EPS8	SPRTN									SNCAIP	MAPK8
RBX1	Igh (family)	EPS15	SRC									SORL1	MAPK9
RC3H1	Ighd	ERBB3	SRPK1									SPACA3	MAPRE2
RC3H2	IGHM	ERCC8	SSX2IP									SPACA4	MAU2
RECQL4	IGK	ERG	STAU1									SPG7	MBP
RELA	IGKC	ERH	STUB1									SPSB3	MCC
REST	IKBKB	ERLIN2	SUFU									SRC (family)	MCCC2
RHOA	IKBKG	ERRFI1	SUMO2									SREBF2	MCF2
RICTOR	IL24	ESPL1	SUPT6H									SSR1	MCM4
RIOK1	IL12RB1	ESR1	TAB1									ST3GAL2	MCM7
RMND5A	Immunoglobulin	ESR2	TAB2									STAT3	MDM2
RNF2	INA	ESRP2	TANK									STK11IP	MEF2D
RNF31	ING3	ESRRB	TBK1									SVIP	MEN1
RNF207	INHA	ESS2	TBL1X									SYCP1	METAP1D
RNGTT	INHBE	ETFA	TBPL1									SYNE2	MICU2
ROCK1	INPPL1	ETFBKMT	TBRG4									SYNGR2	MIGA2
RPAP3	INS	EWSR1	TEDC2									SYPL2	MIPEP
RPS6KA1	INSIG2	EXOC3L2	TEFM									SYVN1	MKI67
RPS6KA3	INSL6	EZH2	TET2									TAC1	MKKS
RPS6KB2	INSR	F12	TFCP2									TADA2A	MLLT11
RUNX1	INVS	FAF1	TFE3									TAGLN2	MMADHC
RUVBL1	IQCB1	FAM13A	TGFB1									TANC2	MST1
RUVBL2	IQCC	FAM187B	TGM2									TARBP1	MST1R
S100A1	ISLR	FAM189B	TIA1									TCF15	MTA2
SAE1	ISOC2	FAM199X	TIMM44									TCTN1	MTHFD1
SENP2	ITFG1	FAM3D	TKTL2									TCTN2	MTHFR
SETD1A	ITGA9	FANCA	TMEM41B									TCTN3	MTR
SGCG	ITGB1	FANCC	TNFRSF1A									TDGF1	MVP
SH2D1B	ITLN1	FANCD2	TNFRSF1B									TEPP	MYB
SH3BGRL	ITLN2	FANCM	TNK2									TEPSIN	MYH9
SH3KBP1	ITM2B	FARSB	TP53									TEX101	MYO1C
SHC1	ITM2C	FASN	TP73									TEX261	MYOF
SIRPA	JUP	FAT3	TP53BP1									TFG	NBEA
SLC12A3	KCND3	FAT4	TPM2									TG	NDRG2
SLC13A1	KCNJ11	FBP1	TPM4									THBS1	NES
SLC27A3	KCNMA1	FBXO6	TPPP									TIGD5	NFS1
SLC5A1	KCTD15	FBXO25	TPT1									TIMP3	NIPBL
SLC6A4	KHDRBS1	FBXO45	TRAF1									TINAG	NLRC4
SLC8A1	KIAA2013	FBXW7	TRAF2									TIPRL	NLRP12
SMARCA4	KIF18B	FCRL3	TRAF6									TMBIM6	NLRX1
SMARCC1	KIF2C	FDPS	TRAF3IP1									TMC6	NMI
SMURF1	KIRREL1	FECH	TRAP1									TMEM11	NMNAT3
SNCA	KLHDC4	FGFR3	TRHDE									TMEM25	NOA1
SNCB	KLHL8	FHL2	TRIM6									TMEM62	NOX5
SNIP1	KLHL15	FHL3	TSFM									TMEM67	NPAS1
SOCS1	KLK3	FKBP5	TTC23									TMEM192	NPEPPS
SOD1	KNSTRN	FLII	TTLL5									TMEM199	NPHP3
SOX9	KRT8	FLYWCH2	TUBA1C									TMEM214	NPRL2
SP100	KRT17	FN1	TUBA3C/TUBA3D									TMEM263	NSF
SPATA5L1	KSR1	FOXC1	TUBB4B									TMEM120A	NUDCD3
SPDL1	L3MBTL2	FOXRED1	TUBG1									TNF	NUP93
SPRTN	LAMA1	FRA10AC1	TUBGCP2									TNFAIP1	NUS1
SQSTM1	LAMP1	FTL	TUBGCP4									TNIP1	NXF5
SRC	LARP7	FTO	TUFM									TOR3A	OGT
SRRM2	LCK	FUNDC1	U2AF2									TP63	OPA1
SSTR3	LCT	FUS	UBASH3A									TRA	OTOF
ST13	LDHAL6B	FUZ	UBASH3B									TRAFD1	P2rx7
STAU1	LDLR	FYN	UBE2M									TRIM44	P3H3
STIP1	LEMD3	GABRB1	UBL4A									TRIM68	PABPC1
STK11	LGALS3BP	GAK	UBQLN2									TRMT44	PABPC4
STRADA	LGI1	GALC	UBXN2A									TSHB	PACRG
STRADB	LIG3	GAN	UQCRC2									TSHR	PACS1
STUB1	LIPC	GANAB	UQCRFS1									TSPAN15	PACS2
SULT1C4	LOXL2	GAPDH	USP15									TTC23L	PANK2
SUMO2	LOXL3	GAPVD1	UVRAG									TTR	PARP2
SUZ12	LRP1	GARS1	VCAM1									TXNDC11	PARP4
TAF15	LRP2	GCG	VCPKMT									TXNDC12	PARVB
TBX3	LRP5	GCH1	VDAC1									TYR	PATJ
TCERG1	LRP	GDI1	VIM									TYRP1	PCBD1
TELO2	LRP1B	GDI2	VIRMA									UBQLN4	PCBP1
TERF2	LRRC32	GFAP	VRK1									UBR2	PCBP4
TERF2IP	LRRK2	GFER	WTAP									UBR3	PCDH20
TERT	LTBP1	GFPT1	XRCC6									UCHL5	PCGF1
TET2	LYPD1	GJA1	YAP1									UFSP2	PCNA
TFCP2	LYZL2	GK2	YBX1									UPK3B	PDE4DIP
TFIP11	MACROD2	GLIPR1	YKT6									VAMP3	PDHB
TGFB1	MAGED2	GLIPR2	YME1L1									VIT	PDLIM5
TGOLN2	MALSU1	GLUL	YWHAG									VMA21	PDP2
THRA	MANEAL	GM2A	YWHAZ									VPS26B	PDS5A
THRB	MANF	GMNN	ZC3H18									VWF	PDS5B
TINF2	MAP4	GMPPA	ZFP36L2									WASF3	PELO
TJP1	MAP1LC3A	GNA15	ZFYVE27									WNT2	PEX6
TJP2	MAP2K2	GNAS	ZNF598									WNT4	PFAS
TMEM102	MAP2K3	GNB2	ZSWIM7									WNT3A	PFKM
TNFRSF1A	MAP3K1	GNB4	ZZEF1									WNT7A	PFKP
TNIP2	MAP3K3	GOPC										WNT9B	PHC1
TNK2	MAP3K7	GOT2										XPNPEP3	PHF8
TOMM70	MAP3K8	GPHN										XPO5	PHGDH
TP53	MAP3K14	GPN1										ZBTB2	PHLPP1
TP53BP1	MAPK3	GPR6										ZBTB25	PHLPP2
TRAF3IP1	MAPK7	GPR37										ZDBF2	PI4K2B
TRAPPC1	MAPK13	GPSM3										ZDHHC6	PIK3C2A
TRAPPC2	MAPRE1	GRAP2										ZNF664	PIK3R1
TRAPPC3	MAPRE3	GRAP										ZYG11B	PLC gamma
TRAPPC4	MAPT	GRB2											PLIN2
TRAPPC5	MAST1	GRB10											PLIN3
TRAPPC9	MAT2B	GRIK1											PLOD1
TRAPPC10	MATK	GRIN1											PML
TRAPPC2L	MATN3	GRN											PNPLA5
TRAPPC6A	MCM2	GRWD1											POLA2
TRAPPC6B	MCM8	GSK3B											POLD1
TRIM25	MEPCE	GSPT1											POLE2
TRIM29	METTL3	GSPT2											POLE
TRIM38	METTL14	GSTM5											POLR2B
TSSK6	METTL18	GUCY1B1											POLR2E
TTI1	METTL22	H1-2											POLR3D
TTI2	METTL23	H1-4											POTEI
TTN	METTL21A	H1-5											PP2A
TUBA1A	METTL21C	H2AC20											PPEF1
TUBA1B	MEX3C	H3-2											PPME1
TUBB	MFSD12	H3-4											PPP1R8
TUBG1	MHC Class I (complex)	H3C1											PPP1R12A
TUBGCP2	MIPOL1	H3C15											PPP1R12B
TUBGCP3	MKS1	H4C1											PPP1R15A
TUBGCP4	MMP3	HACE1											PPP2CA
TXLNG	MOSPD2	HAO1											PPP2R2A
TXNIP	MPPE1	HAO2											PPP3CC
U2AF2	MPZL1	HAUS1											PPP3R1
UBA1	MRC1	HAUS2											PPP6R1
UBASH3A	MSI1	HAUS3											PPP6R3
UBASH3B	MSI2	HAUS5											PRDX6
UBE2M	MTCH2	HBA1/HBA2											PRKACG
UBE2N	MTNR1A	HBB											PRKAR1A
UBE3A	MTNR1B	HCCS											PRKAR1B
UBL4A	MTX1	HCFC1											PRKAR2B
UBQLN2	MVK	HCFC2											PROP1
UBTF	MYC	HCK											PRPF19
UBXN6	MYD88	HDAC1											PRRC2A
UCHL3	MYH10	HDAC2											PRRC2C
UHRF1	MYO1F	HDAC3											PSIP1
UNC45A	MYORG	HDAC4											PSMA1
USP11	MZB1	HDAC6											PSMC4
USP19	N6AMT1	HDAC10											PSMD4
USP43	NACC1	HDLBP											PSMD6
USP50	NAPSA	HEMGN											PSMD7
VCAM1	NBAS	HERC3											PSMD11
VCP	NCK1	HERC4											PSMG3
VHL	NCL	HERC5											PSMG4
VIRMA	NCOA1	HEXIM1											PTGIR
VRK3	NCOR2	HEY1											PTP4A2
VWCE	NDN	HGS											QARS1
WDR76	NDRG1	HIF1A											QRICH1
WDR77	NDUFA3	HIKESHI											RAB29
WDTC1	NECTIN2	HIRA											RAB39B
WTAP	NEDD8	HK2											RAB8A
WWOX	NEFL	HLA-DRA											RACK1
WWP2	NEFM	HLA-DRB1											RAD21
XIAP	NEK2	HLA-DRB3											RAD52
XRCC5	NFATC1	HLA-DRB4											RAN
XRCC6	NFATC2	HLA-DRB5											RANBP2
YAP1	NFKB2	HLTF											RANGRF
YES1	NFKBIA	HMCES											RAPGEF6
YWHAB	NFKBIB	HMGB1											RB1
YWHAE	NFKBIE	HMGB2											RBBP4
YWHAG	NFX1	HNRNPA1											RBSN
YWHAQ	NGB	HNRNPD											RCCD1
YWHAZ	NIF3L1	HNRNPM											RCOR3
ZBTB7A	NLGN3	HOOK1											RFC1
ZC3H18	NLN	HOPX											RFX1
ZNF20	NME1	HSF1											RGPD4 (includes others)
ZNF25	NME4	HSF2											RGS2
ZNF598	NME6	Hsp27											RIC3
ZUP1	NME1-NME2	Hsp70											RING1
	NOL11	HSP90AA1											RIPK2
	NOS2	HSP90AB1											RNF25
	NPB	HSPA2											RNF34
	NPHP1	HSPA4											RPAP1
	NPHP4	HSPA5											RPL4
	NPM1	HSPA6											RPL8
	NPTX1	HSPA8											RPL11
	NR2C2	HSPA9											RPL12
	NR3C1	HSPA1A/HSPA1B											RPL13
	NRM	Hspa1b											RPL14
	NRROS	HSPA1L											RPL15
	NSG2	HSPA4L											RPL18
	NTRK1	HSPB2											RPL28
	NUCB1	HSPBP1											RPL10A
	NUP62	HSPD1											RPL10L
	NYX	HSPH1											RPL13A
	OBSL1	HTN3											RPL23A
	ODF2	HTR1E											RPL7L1
	OMA1	HTT											RPLP0
	OPRM1	HUWE1											RPLP1
	OS9	HYOU1											RPLP2
	OTUB1	HYPK											RPRD2
	OTUD3	IARS1											RPS3
	P4HA3	ID2											RPS8
	P4HB	IDE											RPS10
	PA2G4	IER2											RPS11
	PAFAH1B1	IFIH1											RPS12
	PAK2	IFT122											RPS16
	PALLD	IGF1R											RPS17
	PAN2	Ikb											RPS18
	PARD3	IKBKB											RPS19
	PARK7	IKBKE											RPS27
	PAT-SM6	IKBKG											RPS15A
	PAWR	IL16											RPS4Y1
	PCDHA10	IL32											RPSA
	PCSK9	IL17RC											RRP1B
	PDE10A	ILF2											RWDD1
	PDE3A	ILK											RXRB
	PDIA2	ILRUN											RYBP
	PDIA3	IMPA2											S100A10
	PDIA4	INA											Samd13
	PDIA5	INPPL1											SAMHD1
	PDIA6	INS											SCRN2
	PDPK1	INSIG2											SDR9C7
	PHB	INVS											SEC24C
	PHIP	IPPK											SELENBP1
	PHLDB2	IQCB1											SEM1
	PI3K p85	IRAK1											SERPINA4
	PIAS1	IRS4											SETMAR
	PIGA	ISG15											SETX
	PIH1D1	ISYNA1											SF1
	PIK3C3	ITFG1											SF3A1
	PIK3CA	ITGA4											SF3A2
	PINK1	ITM2B											SF3A3
	PLAA	ITSN2											SGTA
	PLCL1	IVNS1ABP											SHOX2
	PLEKHA4	JAK2											SIAH1
	PLG	JMJD4											SIMC1
	PLP1	JUN											SIRT6
	POC1A	KAT5											SKA2
	POC1B	KAT2A											SKP1
	PODN	KAT2B											SLC1A2
	PODXL	KATNA1											SLC25A1
	POGLUT1	KBTBD4											SLC27A2
	POGLUT2	KCMF1											SLC4A7
	POLK	KCNA5											SMC3
	POLR3H	KCNAB2											SMC4
	PON2	KCNC4											SMC1A
	POTEE/POTEF	KCND2											SMCR8
	PPARG	KCND3											SNAP25
	PPIA	KCNH2											SNRPD2
	PPIB	KCNH5											SNX2
	PPIE	KCNJ10											SNX6
	PPP1CA	KCNJ11											SNX20
	PPP1CC	KCNMA1											SNX24
	Ppp1cc	KCNQ4											SPHK1
	PPP2R2D	KCNV2											SPTAN1
	PPP4R4	KCTD2											SRP54
	PPP6C	KCTD5											SRRT
	PPT1	KCTD15											SRSF1
	PRDM1	KCTD17											SRY
	PRDM16	KDM2B											SSH3
	PRDX4	KEAP1											SSMEM1
	PRKAA1	KHDRBS2											SSRP1
	PRKAB1	KIAA1191											STAG2
	PRKAB2	KIF1B											STAMBP
	PRKAG1	KIF1C											STAT1
	PRKCSH	KIF5B											STK4
	PRKCZ	KIFBP											STX1A
	PRKDC	KLC1											STXBP1
	PRKN	KLC2											SUGT1
	PRL	KLHDC2											SULT2B1
	PRMT1	KLHL10											SUMO3
	PRMT7	KLHL15											SUPT16H
	PRNP	KLHL34											SUPT20H
	PROZ	KLHL36											SUPT3H
	PRPF8	KNSTRN											SUPT7L
	PRPF38A	KPNA4											SYNPO2
	PRSS2	KPNA5											TACC3
	PRSS50	KPNA6											TACSTD2
	PSEN1	KRAS											TADA3
	PSMA2	KRT17											TAF10
	PSMA3	KRT18											TAF12
	PSMB1	KSR1											TAF6L
	PSMC5	LALBA											TAF9B
	PSMD14	LAMP2											TANC1
	PSME3	LARP1											TBC1D23
	PTCH1	LARP7											TBCE
	PTEN	LARP1B											TBL2
	PTK6	LARS1											TCAP
	PTMA	LAX1											TCP1
	PTPN11	LCK											TEX45
	PTPRF	LDHA											TGFBR1
	PTPRN2	LGALS3BP											TH
	PTPRN	LIPC											THAP4
	PTPRO	LMAN1											THSD4
	PTRH2	LOC102724788/PRODH											TIGD7
	PWP1	LPGAT1											TLN1
	PXN	LRPPRC											TLR4
	RAC3	LRRC28											TM4SF1
	RAD50	LRRC56											TMED8
	RAF1	LRRFIP2											TNKS2
	RALBP1	LRRK1											TNKS
	RBP3	LRRK2											TNNC1
	RBX1	LSM12											TPP2
	RC3H1	LUZP1											TRADD
	RC3H2	LZTR1											TRIM9
	RCC1L	MAD1L1											TRIM16L
	RCN1	MAGED2											TRIO
	RCN2	MAP2K1											TRIP4
	RECQL4	MAP2K2											TRMT12
	REEP6	MAP2K3											TRRAP
	REL	MAP2K5											TSC1
	RELA	MAP3K1											TSC22D3
	RELB	MAP3K3											TSPYL6
	REST	MAP3K7											TSR3
	RETN	MAP3K8											TSSK1B
	RIOK1	MAP3K14											TTC1
	RIPK1	MAPK3											TTC4
	RIPK3	MAPK6											TTC8
	RIPK4	MAPK7											TTC30B
	RNF4	MAPK8											TTC9C
	RNF31	MAPK9											TUBB6
	RNF40	MAPK14											TUBB2A
	RNF123	MAPRE2											TXNRD1
	RNF146	MAPT											TYSND1
	RNF183	MATR3											UBAC1
	RPA1	MAU2											UBB
	RPA2	MAVS											UBE2L6
	RPA3	MBP											UBR4
	RPIA	MCC											UCHL1
	RPL3	MCCC1											UNC119B
	RPL17	MCCC2											UPF1
	RPL23	MCF2											USO1
	RPN1	MCL1											USP12
	RPN2	MCM2											USP14
	RPS6KA1	MCM4											USP46
	RPS6KA3	MCM5											VAMP2
	RPS6KB2	MCM7											VANGL2
	RRAGD	MDM2											VARS1
	RRAS	MDN1											VASH1
	RSPO3	MED9											VASP
	RSRC1	MED12											VAV1
	RTN2	MEF2D											VILL
	RUNX1	MEN1											VPS13B
	RUVBL2	MEPCE											VPS4B
	SCGB1D1	METAP1D											VSX1
	SCGB1D4	METTL3											VWA2
	SCRIB	METTL14											WDCP
	SDF2	METTL22											WDR6
	SDF4	METTL21A											WDR20
	SDF2L1	METTL21C											WDR37
	SEC62	MICU2											WDR41
	SEC63	MIGA2											WDR47
	SEC61A1	MIPEP											WDR48
	SEL1L	MKI67											WDR82
	SELENOS	MKKS											WDR87
	SENP5	MKS1											WNK1
	SEPTIN2	MLF2											XPC
	SEPTIN6	MLLT11											XRCC1
	SEPTIN7	MMADHC											YTHDF1
	SEPTIN9	MME											YTHDF3
	SEPTIN10	MOSPD2											ZBTB1
	SERPINA1	MPZL1											ZFAND2A
	SERPINB5	MST1											ZFHX4
	SERPINB11	MST1R											ZNF16
	SERPINF1	MTA2											ZNF217
	SERPINH1	MTCH2											ZNF488
	SET	MTF1											ZNF544
	SFTPC	MTHFD1											ZNF608
	SH3BP4	MTHFR											ZNF618
	SH3KBP1	MTNR1A											ZNF703
	SHC1	MTR											ZNF800
	SIAH2	MVP											ZNF804A
	SIGLEC10	MYB											ZSCAN32
	SIGLEC12	MYC
	SIGLEC16	MYD88
	SIGMAR1	MYH9
	SIL1	MYLK2
	SIRPA	MYO1C
	SIRT1	MYOF
	SIRT3	NANOG
	SKI	NBEA
	SLC16A10	NDN
	SLC22A8	NDRG1
	SLC25A3	NDRG2
	SLC25A5	NECTIN2
	SLC25A6	NEDD8
	SLC39A11	NEK2
	SLC6A6	NES
	SLC7A8	NFATC2
	SLN	NFKB2
	SMARCA2	NFKBIA
	SMOX	NFKBIB
	SMPD1	NFKBIE
	SMPD2	NFS1
	SMURF1	NFX1
	SNAI1	NIF3L1
	SNCA	NIPBL
	SNCAIP	NLRC4
	SNW1	NLRP12
	SOAT1	NLRX1
	SOD1	NME1
	SORL1	NME1-NME2
	SOST	NMI
	SOX2	NMNAT3
	SPACA3	NMRAL1
	SPACA4	NOA1
	SPART	NOL8
	SPDL1	NOX5
	SPG7	NPAS1
	SPPL2B	NPEPPS
	SPSB3	NPHP1
	SPTB	NPHP3
	SQSTM1	NPHP4
	SRC	NPRL2
	SRC (family)	NR2C2
	SREBF2	NSF
	SSR1	NTRK1
	ST3GAL2	NUDCD3
	STAG1	NUP93
	STAT3	NUS1
	STAU1	NXF5
	STIP1	ODF2
	STK11IP	OGT
	STMN1	OPA1
	STUB1	OTOF
	SUFU	OTUB1
	SUMO2	P2rx7
	SUPT6H	P3H3
	SVIP	PABPC1
	SYCP1	PABPC4
	SYNE2	PACRG
	SYNGR2	PACS1
	SYPL2	PACS2
	SYVN1	PACSIN1
	TAB1	PACSIN2
	TAB2	PACSIN3
	TAC1	PAK1
	TADA2A	PAN2
	TAF15	PANK2
	TAGLN2	PARD3
	TANC2	PARP1
	TANK	PARP2
	TARBP1	PARP4
	TARDBP	PARVB
	TBK1	PATJ
	TCERG1	PCBD1
	TCF15	PCBP1
	TCTN1	PCBP4
	TCTN2	PCDH20
	TCTN3	PCGF1
	TDGF1	PCNA
	TEDC2	PDE4DIP
	TEPP	PDHB
	TEPSIN	PDLIM5
	TEX101	PDP2
	TEX261	PDPK1
	TFCP2	PDS5A
	TFE3	PDS5B
	TFEB	PELO
	TFG	PEX6
	TG	PFAS
	TGFB1	PFKM
	TGM2	PFKP
	THBS1	PFN1
	TIGD5	PHB
	TIMM13	PHC1
	TIMP3	PHF8
	TINAG	PHGDH
	TIPRL	PHLPP1
	TLR9	PHLPP2
	TMBIM6	PI3K p85
	TMC6	PI4K2B
	TMEM11	PIH1D1
	TMEM25	PIK3C2A
	TMEM62	PIK3R1
	TMEM67	PIK3R2
	TMEM192	PINK1
	TMEM199	PLC gamma
	TMEM214	PLEKHA4
	TMEM263	PLIN2
	TMEM120A	PLIN3
	TMEM132A	PLOD1
	TMPO	PML
	TNF	PNPLA5
	TNFAIP1	POC1A
	TNFRSF1A	POC1B
	TNFRSF1B	POLA2
	TNIP1	POLD1
	TOPBP1	POLE2
	TOR3A	POLE
	TP53	POLR2B
	TP63	POLR2E
	TRA	POLR3D
	TRAF2	POTEE/POTEF
	TRAF6	POTEI
	TRAFD1	POU5F1
	TRIM29	PP2A
	TRIM44	PPARG
	TRIM68	PPEF1
	TRMT44	PPID
	TSHB	PPIE
	TSHR	PPME1
	TSPAN15	PPP1CA
	TTC23	PPP1CC
	TTC23L	PPP1R8
	TTR	PPP1R12A
	TUBA1A	PPP1R12B
	TUBA4A	PPP1R15A
	TUBB3	PPP1R9B
	TUBB8	PPP2CA
	TUBB4A	PPP2R1A
	TUBG1	PPP2R2A
	TUBGCP2	PPP3CC
	TUBGCP3	PPP3R1
	TUBGCP4	PPP5C
	TUFM	PPP6C
	TXNDC11	PPP6R1
	TXNDC12	PPP6R3
	TXNIP	PPT1
	TYR	PRDX1
	TYRP1	PRDX6
	U2AF2	PRKAA1
	UBASH3B	PRKAB1
	UBC	PRKACG
	UBE2M	PRKAG1
	UBE2S	PRKAR1A
	UBE3A	PRKAR1B
	UBL4A	PRKAR2B
	UBQLN2	PRKCE
	UBQLN4	PRKCG
	UBR1	PRKCI
	UBR2	PRKCZ
	UBR3	PRKDC
	UCHL5	PRKN
	UFSP2	PRMT5
	UPK3B	PRMT9
	VAMP3	PROP1
	VCP	PRPF8
	VHL	PRPF19
	VIM	PRRC2A
	VIRMA	PRRC2C
	VIT	PSEN1
	VMA21	PSIP1
	VPS26B	PSMA1
	VRK2	PSMA2
	VSIG8	PSMA3
	VWCE	PSMC4
	VWF	PSMC5
	WAPL	PSMD4
	WASF3	PSMD6
	WDFY4	PSMD7
	WNT2	PSMD11
	WNT4	PSMD14
	WNT3A	PSMG3
	WNT7A	PSMG4
	WNT9B	PTEN
	WTAP	PTGIR
	WWP2	PTK6
	XPNPEP3	PTMA
	XPO5	PTP4A2
	YAF2	PTPN11
	YAP1	PTPN12
	YWHAB	PTPRF
	YWHAZ	PXN
	ZBTB2	QARS1
	ZBTB25	QRICH1
	ZC3H18	RAB29
	ZDBF2	RAB39B
	ZDHHC6	RAB8A
	ZFYVE21	RACK1
	ZNF598	RAD21
	ZNF664	RAD52
	ZSWIM7	RAD23A
	ZUP1	RAF1
	ZYG11B	RAN
	ZZEF1	RANBP2
		RANGRF
		RAPGEF6
		RARA
		RASA1
		RB1
		RBBP4
		RBSN
		RBX1
		RC3H1
		RC3H2
		RCCD1
		RCOR3
		RECQL4
		REL
		RELA
		RELB
		REST
		RFC1
		RFX1
		RGPD4 (includes others)
		RGS2
		RHOA
		RIC3
		RING1
		RIPK1
		RIPK2
		RIPK3
		RIPK4
		RNF2
		RNF4
		RNF25
		RNF31
		RNF34
		RNF123
		RNF207
		RPA1
		RPA2
		RPA3
		RPAP1
		RPL3
		RPL4
		RPL8
		RPL11
		RPL12
		RPL13
		RPL14
		RPL15
		RPL18
		RPL23
		RPL28
		RPL38
		RPL10A
		RPL10L
		RPL13A
		RPL23A
		RPL7L1
		RPLP0
		RPLP1
		RPLP2
		RPN1
		RPN2
		RPRD2
		RPS3
		RPS8
		RPS10
		RPS11
		RPS12
		RPS16
		RPS17
		RPS18
		RPS19
		RPS27
		RPS15A
		RPS4Y1
		RPS6KA1
		RPS6KA3
		RPS6KB2
		RPSA
		RRM2
		RRP1B
		RUNX1
		RUVBL1
		RUVBL2
		RWDD1
		RXRB
		RYBP
		S100A10
		Samd13
		SAMHD1
		SCFD1
		SCRIB
		SCRN2
		SDHA
		SDHAF2
		SDR9C7
		SEC24C
		Secretase gamma
		SELENBP1
		SEM1
		SENP2
		SEPTIN2
		SEPTIN7
		SERPINA1
		SERPINA4
		SERPINH1
		SETMAR
		SETX
		SF1
		SF3A1
		SF3A2
		SF3A3
		SGTA
		SH3BGRL
		SH3KBP1
		SHC1
		SHOX2
		SIAH1
		SIMC1
		SIRPA
		SIRT6
		SKA2
		SKI
		SKP1
		SLC12A3
		SLC1A2
		SLC1A5
		SLC25A1
		SLC25A3
		SLC25A5
		SLC25A6
		SLC27A2
		SLC27A3
		SLC4A7
		SLC6A4
		SMC3
		SMC4
		SMC1A
		SMCR8
		SMURF1
		SNAI1
		SNAP25
		SNCA
		SNIP1
		SNRPD2
		SNW1
		SNX2
		SNX6
		SNX20
		SNX24
		SOAT1
		SOCS1
		SOD1
		SOST
		SOX2
		SP1
		SPATA5L1
		SPDL1
		SPHK1
		SPPL2B
		SPRTN
		SPTAN1
		SPTB
		SQSTM1
		SRC
		SRP54
		SRPK1
		SRRM2
		SRRT
		SRSF1
		SRY
		SSH3
		SSMEM1
		SSRP1
		SSX2IP
		ST13
		STAG1
		STAG2
		STAMBP
		STAT1
		STAU1
		STIP1
		STK4
		STMN1
		STUB1
		STX1A
		STXBP1
		SUGT1
		SULT2B1
		SUMO2
		SUMO3
		SUPT16H
		SUPT20H
		SUPT3H
		SUPT7L
		SYNPO2
		TAB1
		TAB2
		TACC3
		TACSTD2
		TADA3
		TAF10
		TAF12
		TAF15
		TAF6L
		TAF9B
		TANC1
		TANK
		TARDBP
		TBC1D23
		TBCE
		TBK1
		TBL2
		TBX3
		TCAP
		TCERG1
		TCP1
		TEDC2
		TET2
		TEX45
		TFCP2
		TFE3
		TFEB
		TGFB1
		TGFBR1
		TGM2
		TH
		THAP4
		THSD4
		TIGD7
		TIMM13
		TLN1
		TLR4
		TLR9
		TM4SF1
		TMED8
		TMEM132A
		TMPO
		TNFRSF1A
		TNFRSF1B
		TNKS2
		TNKS
		TNNC1
		TOMM70
		TOPBP1
		TP53
		TPP2
		TRADD
		TRAF1
		TRAF2
		TRAF6
		TRAF3IP1
		TRAPPC4
		TRIM6
		TRIM9
		TRIM25
		TRIM38
		TRIM16L
		TRIO
		TRIP4
		TRMT12
		TRRAP
		TSC1
		TSC22D3
		TSPYL6
		TSR3
		TSSK6
		TSSK1B
		TTC1
		TTC4
		TTC8
		TTC23
		TTC30B
		TTC9C
		TUBA1A
		TUBA1B
		TUBA4A
		TUBB3
		TUBB6
		TUBB8
		TUBB
		TUBB2A
		TUBB4A
		TUBB4B
		TUBG1
		TUBGCP2
		TUBGCP3
		TUBGCP4
		TUFM
		TXNIP
		TXNRD1
		TYSND1
		U2AF2
		UBAC1
		UBASH3A
		UBASH3B
		UBB
		UBC
		UBE2L6
		UBE2M
		UBE2S
		UBE3A
		UBL4A
		UBQLN2
		UBR1
		UBR4
		UCHL1
		UCHL3
		UNC119B
		UPF1
		USO1
		USP11
		USP12
		USP14
		USP43
		USP46
		USP50
		VAMP2
		VANGL2
		VARS1
		VASH1
		VASP
		VAV1
		VCAM1
		VCP
		VHL
		VILL
		VIM
		VIRMA
		VPS13B
		VPS4B
		VRK1
		VRK2
		VRK3
		VSIG8
		VSX1
		VWA2
		WAPL
		WDCP
		WDFY4
		WDR6
		WDR20
		WDR37
		WDR41
		WDR47
		WDR48
		WDR76
		WDR82
		WDR87
		WNK1
		WTAP
		WWOX
		WWP2
		XPC
		XRCC1
		XRCC6
		YAF2
		YAP1
		YES1
		YTHDF1
		YTHDF3
		YWHAB
		YWHAE
		YWHAQ
		YWHAZ
		ZBTB1
		ZBTB7A
		ZC3H18
		ZFAND2A
		ZFHX4
		ZFP36L2
		ZFYVE21
		ZNF16
		ZNF217
		ZNF488
		ZNF544
		ZNF598
		ZNF608
		ZNF618
		ZNF703
		ZNF800
		ZNF804A
		ZSCAN32
		ZUP1
